# Supplementary material for: Tissue-specific multi-omics analysis of atrial fibrillation
Source: Springer Nature journal article supplement (doi:10.1038/s41467-022-27953-1), 2022-01-21
Supplement: MOESM1 [file 41467_2022_27953_MOESM1_ESM.pdf › 41467_2022_27953_MOESM1_ESM.pdf]

## SUPPLEMENTARY INFORMATION:

### Tissue-specific multi-omics analysis of atrial fibrillation

Ines Assum<sup>1,2,†</sup>, Julia Krause<sup>3,4,†</sup>, Markus O. Scheinhardt<sup>5</sup>, Christian Müller<sup>3,4</sup>, Elke Hammer<sup>6,7</sup>, Christin S. Börschel<sup>4,8</sup>, Uwe Völker<sup>6,7</sup>, Lenard Conradi<sup>9</sup>, Bastiaan Geelhoed<sup>4,8,10</sup>, Tanja Zeller<sup>3,4,\*</sup>, Renate B. Schnabel<sup>4,8,\*</sup>, Matthias Heinig<sup>1,2,11,\*</sup>

<sup>1</sup>Computational Health Center, Helmholtz Zentrum München Deutsches Forschungszentrum für Gesundheit und Umwelt (GmbH), Neuherberg, Germany.

<sup>2</sup>Department of Informatics, Technical University Munich, München, Germany.

<sup>3</sup>University Center of Cardiovascular Science, University Heart and Vascular Center Hamburg, Hamburg, Germany.

<sup>4</sup>Partner site Hamburg/Kiel/Lübeck, DZHK (German Center for Cardiovascular Research), Hamburg, Germany.

<sup>5</sup>Institute of Medical Biometry and Statistics, University of Lübeck, Lübeck, Germany.

<sup>6</sup>Interfaculty Institute for Genetics and Functional Genomics, University Medicine Greifswald, Greifswald, Germany.

<sup>7</sup>Partner site Greifswald, DZHK (German Center for Cardiovascular Research), Greifswald, Germany.

<sup>8</sup>Department of Cardiology, University Heart and Vascular Center Hamburg, Hamburg, Germany.

<sup>9</sup>Department of Cardiovascular Surgery, University Heart and Vascular Center Hamburg, Hamburg, Germany.

<sup>10</sup>Department of Cardiology, University of Groningen, University Medical Center Groningen, Groningen, Netherlands

<sup>11</sup>Partner site Munich, DZHK (German Center for Cardiovascular Research), Munich, Germany.

<sup>†,\*</sup> These authors contributed equally.

Correspondence to Matthias Heinig [matthias.heinig@helmholtz-muenchen.de](mailto:matthias.heinig@helmholtz-muenchen.de) or Renate B. Schnabel [r.schnabel@uke.de](mailto:r.schnabel@uke.de).

## Supplementary Figures and Figure Legends

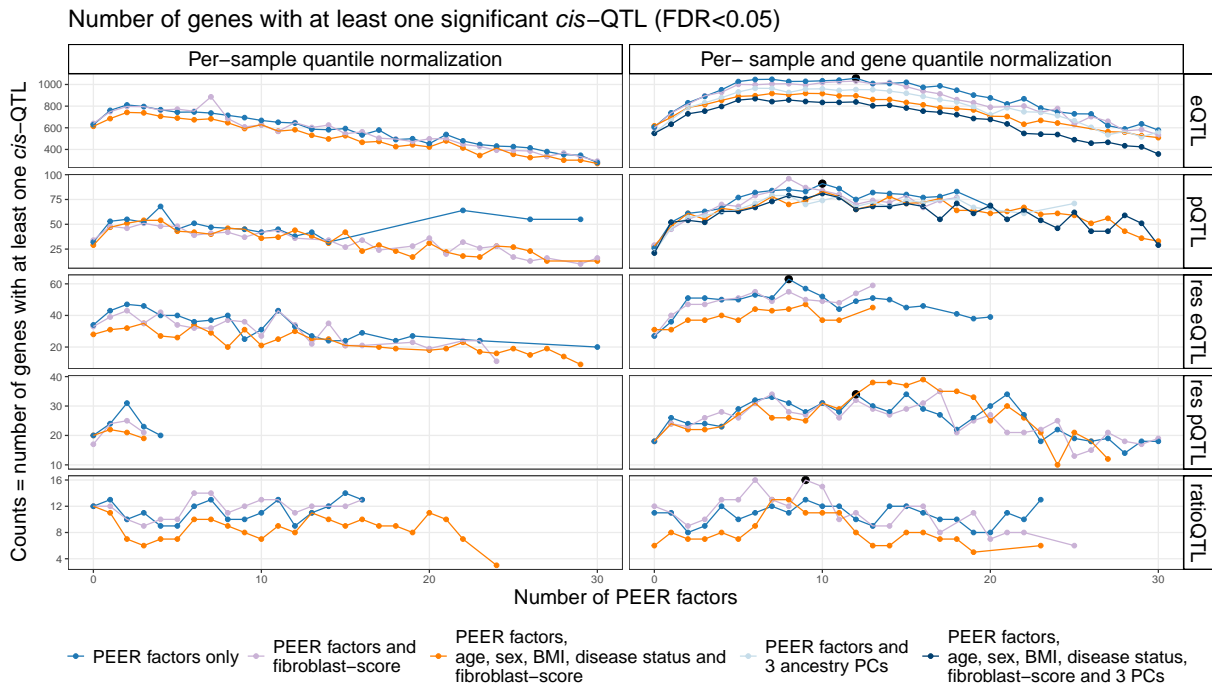

**Figure 1: *Cis*-QTL analysis results for different covariate sets and number of PEER factors.**

PEER analysis was performed to account for unknown variation in the data. Displayed are the number of genes with at least one QTL variant with a FDR<0.05 for different combinations of normalization, number of PEER factors used in the regression and additional covariates. Black dots mark the chosen number of PEER factors and covariates as the maximal number of discovered QTL genes at a FDR<0.05.

QTL, quantitative trait loci; PEER, probabilistic estimation of expression residuals; FDR, false discovery rate; eQTL, expression quantitative trait loci; pQTL, protein quantitative trait loci; res eQTL, expression residual quantitative trait loci; res pQTL, protein residual quantitative trait loci; ratioQTL, ratio quantitative trait loci; Source data are provided as a Source Data file.

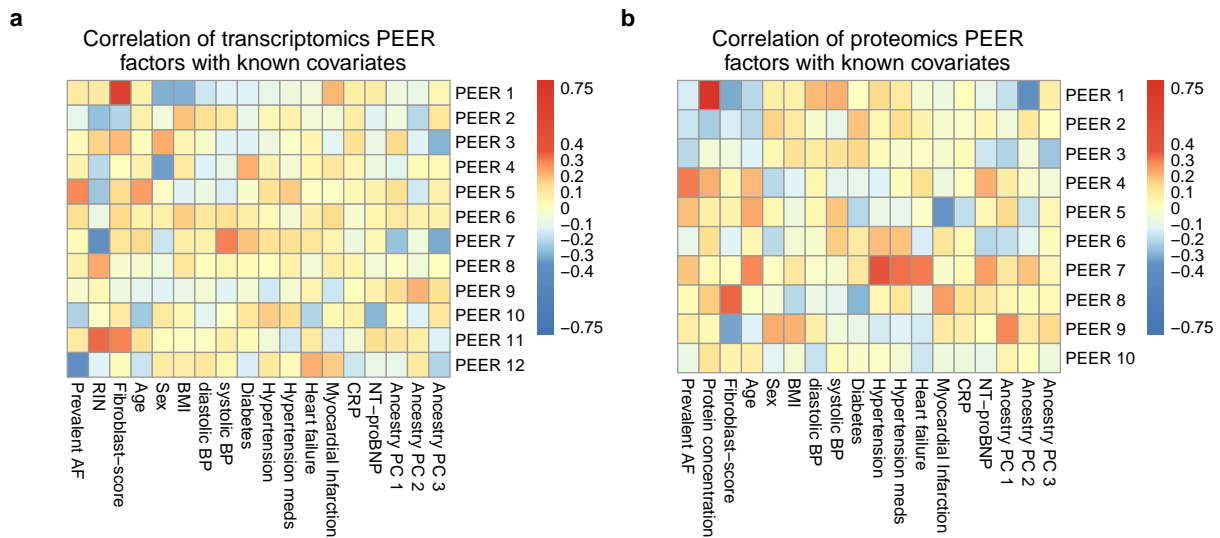

**Figure 2: Correlation of PEER factors with common risk factors of AF and technical covariates.** Pearson correlation of different PEER factors and known risk factors or technical covariates.

a: Transcriptomics analysis: Fibroblast-score and RIN-score highly correlate with PEER factors used in the final *cis*-eQTL analysis.

b: Proteomics analysis: Fibroblast-score and original sample protein concentration highly correlate with PEER factors used in the final *cis*-pQTL analysis.

PEER, probabilistic estimation of expression residuals; QTL, quantitative trait loci; AF, (prevalent) atrial fibrillation; RIN, RNA integrity number; BMI, body mass index; diasBP, diastolic blood pressure; sysBP, systolic blood pressure; HF, heart failure; MI, myocardial infarction; CRP, C-reactive protein; NT-proBNP, N-terminal prohormone of brain natriuretic peptide; Source data are provided as a Source Data file.

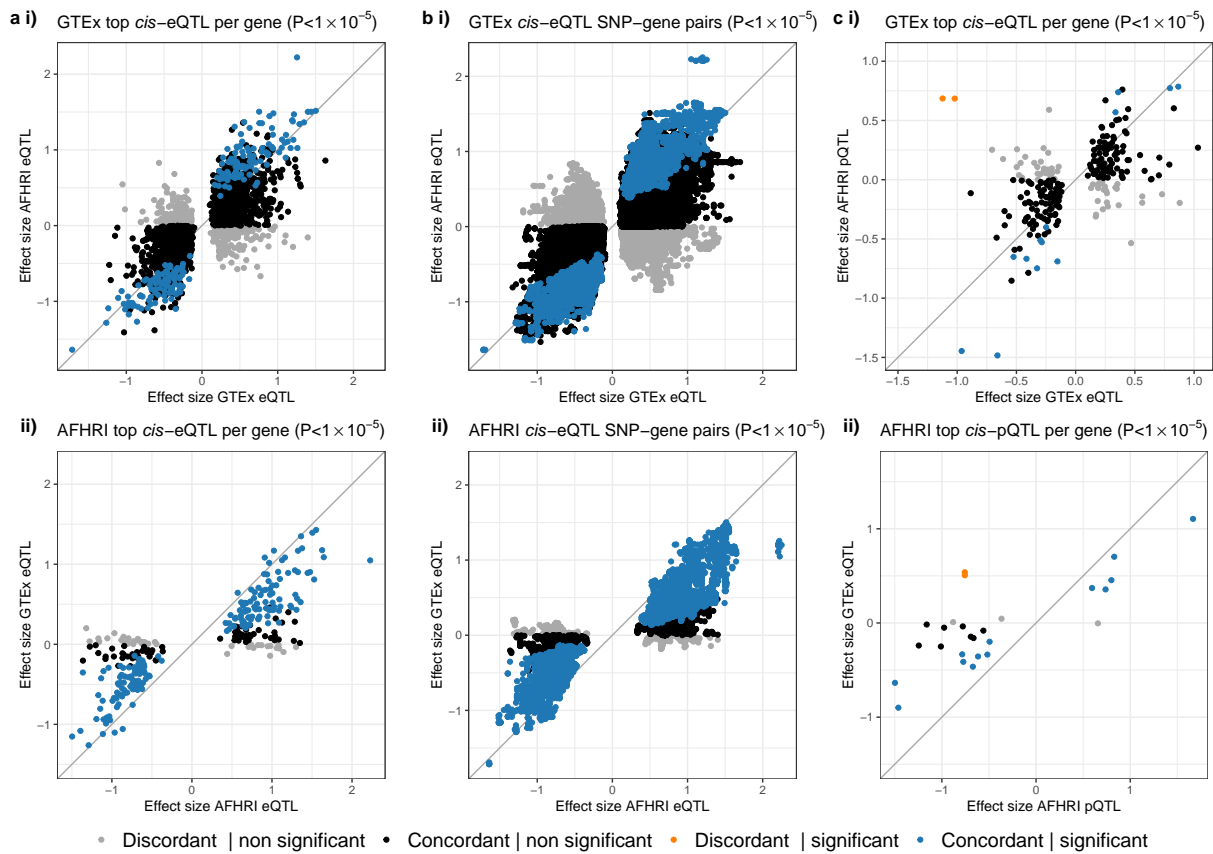

**Figure 3: Comparison of *cis*-eQTL and pQTL results to GTEx *cis*-eQTLs in atrial appendage tissue.**

a: Comparison of effect sizes of eQTLs in the GTEx and AFHRI cohort for i) the top significant *cis*-eQTL per gene in GTEx ( $P < 1 \times 10^{-5}$ ) and ii) the top significant *cis*-eQTL per gene in AFHRI ( $P < 1 \times 10^{-5}$ ).

b: Comparison of effect sizes of eQTLs in the GTEx and AFHRI cohort for i) all significant *cis*-eQTL SNP-gene pairs in GTEx ( $P < 1 \times 10^{-5}$ ) and ii) all significant *cis*-eQTL SNP-gene pairs in AFHRI ( $P < 1 \times 10^{-5}$ ).

c: Comparison of effect sizes of eQTLs in GTEx and pQTLs in the AFHRI cohort i) the top significant *cis*-eQTL per gene in GTEx ( $P < 1 \times 10^{-5}$ ) and ii) the top significant *cis*-pQTL per gene in AFHRI ( $P < 1 \times 10^{-5}$ ).

All cutoffs refer to uncorrected, nominal  $P$  values derived by two-sided tests. Permutation tests were performed for all reported GTEx results, all data from the AFHRI cohort was evaluated by  $T$  tests.

eQTL, expression quantitative trait loci; pQTL, protein quantitative trait loci; GTEx, Genotype-Tissue Expression project; Source data are provided as a Source Data file.



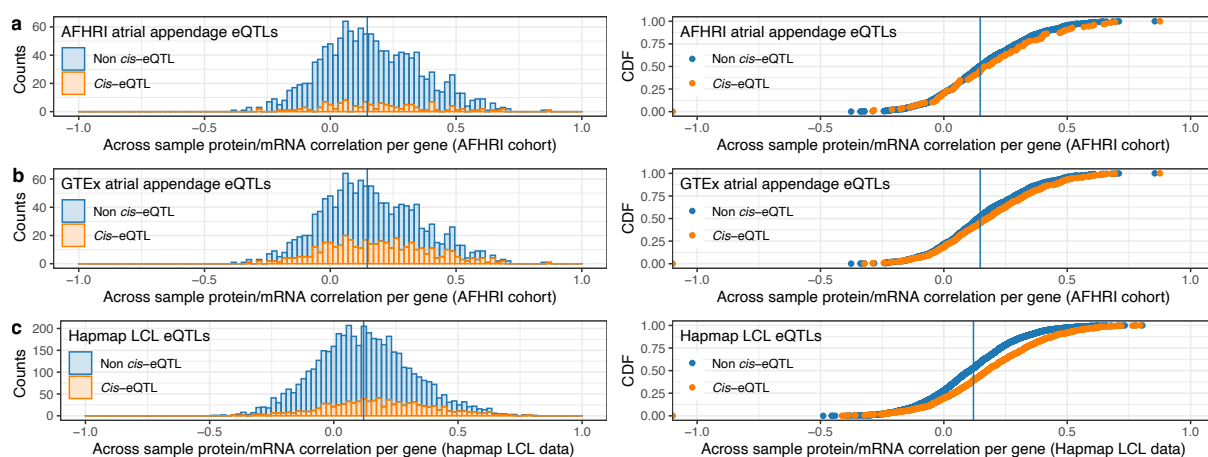

**Figure 4: Pearson correlation between transcript and protein levels dependent on *cis*-eQTL annotations in different datasets.**

a: AFHRI cohort and *cis*-eQTLs. Histogram and cumulative density function.

b: AFHRI cohort and GTEx *cis*-eQTL annotations. Histogram and cumulative density function.

c: Hapmap LCL data and Hapmap LCL *cis*-eQTL annotations. Histogram and cumulative density function.

eQTL, expression quantitative trait loci; LCL, lymphoblastoid cell line; Source data are provided as a Source Data file.

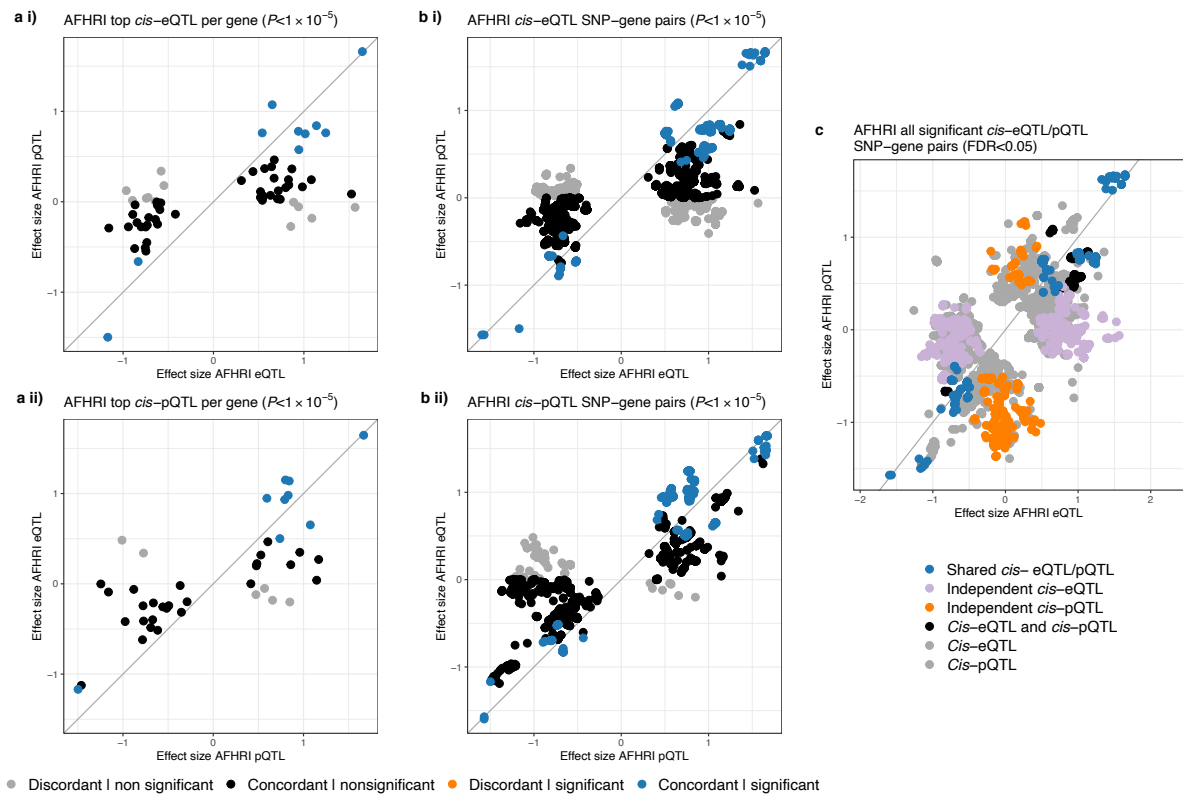

**Figure 5: Between-omic comparison of *cis*-quantitative trait loci results.**

a: Comparison of effect sizes of eQTLs and pQTLs in the AFHRI cohort for i) the top significant *cis*-eQTL per gene ( $P < 1 \times 10^{-5}$ ) and ii) the top significant *cis*-pQTL per gene ( $P < 1 \times 10^{-5}$ ).  
 b: Comparison of effect sizes of eQTLs and pQTLs in the AFHRI cohort for i) all significant *cis*-eQTL SNP-gene pairs ( $P < 1 \times 10^{-5}$ ) and ii) all significant *cis*-pQTL SNP-gene pairs ( $P < 1 \times 10^{-5}$ ).  
 c: Comparison of effect sizes of eQTLs and pQTLs in the AFHRI cohort for all significant *cis*-eQTL and *cis*-pQTL SNP-gene pairs (FDR<0.05, Benjamini-Hochberg procedure).

Nominal  $P$  values were derived based on two-sided  $T$  tests. FDR correction per omic based on the Benjamini-Hochberg procedure was applied to account for multiple comparisons.

eQTL, expression quantitative trait loci; pQTL, protein quantitative trait loci; SNP, single-nucleotide polymorphism; FDR, false discovery rate; Source data are provided as a Source Data file.

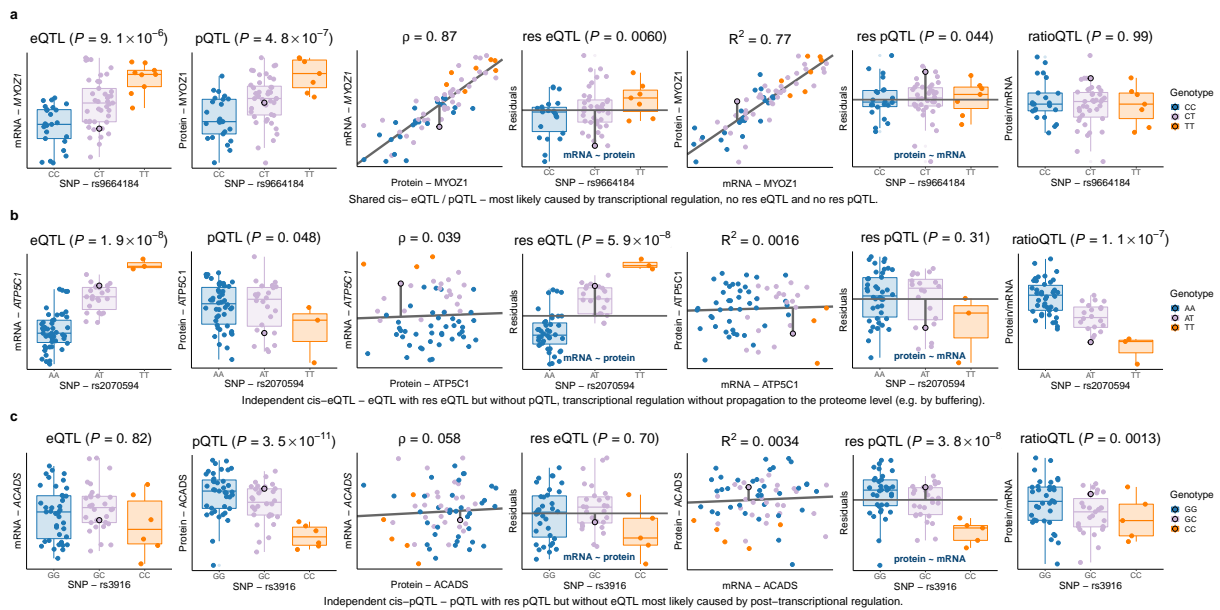

**Figure 6: Extended figure for functional *cis*-QTL categories.**

*Cis*-QTL boxplots and scatter plots representing residual derivation and mRNA/protein correlation to visualize the three functional QTL categories. Nominal  $P$  values were derived based on two-sided  $T$  tests for  $N = 75$  (eQTL),  $N = 75$  (pQTL) and  $N = 66$  (ratioQTL, res eQTL, res pQTL) biologically independent samples. To assess significance, FDR correction per omic based on the Benjamini-Hochberg procedure was applied to account for multiple comparisons.

a: Shared eQTLs/pQTLs represent QTLs, where the effect of transcriptional regulation translates into mRNA and protein abundance exemplified by the significant SNP-gene pair rs9664184-MYOZ1. No corresponding ratioQTL can be observed as the genetic variation is shared across both omics levels.

b: Independent eQTLs depict variants with regulation on mRNA but not on protein level displayed by the significant SNP-transcript pair rs2070594-ATP5C1.

c: Independent pQTLs represent variants that show regulation only on protein level as shown for the SNP-protein pair rs3916-ACADS. Genetic influence is not observable on transcript level.

In the boxplots, the lower and upper hinges correspond to the first and third quartiles (the 25th and 75th percentiles). The median is denoted by the central line in the box. The upper/lower whisker extends from the hinge to the largest/smallest value no further than  $1.5 \cdot \text{IQR}$  from the hinge.

eQTL, expression quantitative trait loci; pQTL, protein quantitative trait loci; res eQTL, expression residual quantitative trait loci; res pQTL, protein residual quantitative trait loci; ratioQTL, ratio quantitative trait loci; IQR, interquartile range;

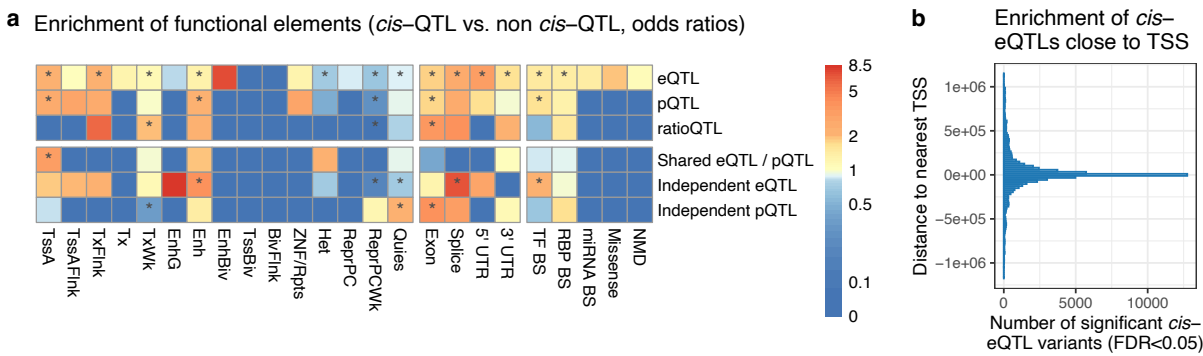

**Figure 7: Enrichment of functional elements for different *cis*-QTL categories.**

a: Annotations of the top 5 *cis*-QTL hits per gene were compared to a background distribution (100 background SNPs per QTL SNP) matched for MAF and distance to TSS. Displayed are odds ratios that represent enrichment or depletion, stars mark *P* values < 0.05 for the corresponding Fisher's exact test (two-sided).

b: Enrichment of *cis*-eQTL hits close to the nearest TSS.

QTL, quantitative trait loci; eQTL, expression quantitative trait loci; pQTL, protein quantitative trait loci; ratioQTL, ratio quantitative trait loci; UTR, untranslated region; TF, transcription factor; BS, binding site; NMD, nonsense-mediated decay; TSS, transcription start site; FDR, false discovery rate; Source data are provided as a Source Data file.

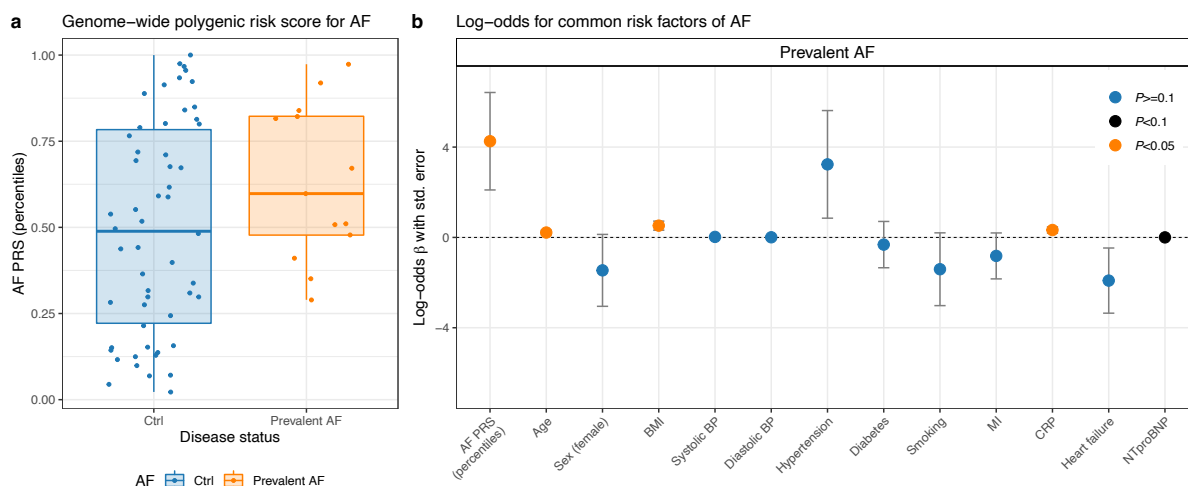

**Figure 8: Genome-wide polygenic score adds relevant information in classifying atrial fibrillation disease status.**

a: Percentiles of the atrial fibrillation polygenic risk score for controls and prevalent AF cases ( $T = -1.8$ ,  $P = 0.043$ , one-sided  $T$  test,  $N = 67$ ).

b: Logistic regression results for common risk factors of AF. Significant and comparably strong effect for the PRS variable ( $\beta = 4.3$ ,  $P = 0.048$ , two-sided  $Z$  test,  $N = 64$ ,  $df = 51$ ). Data are presented as log-odds ratio  $\pm$  standard error.

In the boxplots, the lower and upper hinges correspond to the first and third quartiles (the 25th and 75th percentiles). The median is denoted by the central line in the box. The upper/lower whisker extends from the hinge to the largest/smallest value no further than  $1.5 \cdot \text{IQR}$  from the hinge.

AF, atrial fibrillation; PRS, genome-wide polygenic score; BMI, body mass index; BP, blood pressure; MI, myocardial infarction; CRP, C-reactive protein; NT-proBNP, N-terminal prohormone of brain natriuretic peptide; IQR, interquartile range; Source data are provided as a Source Data file.

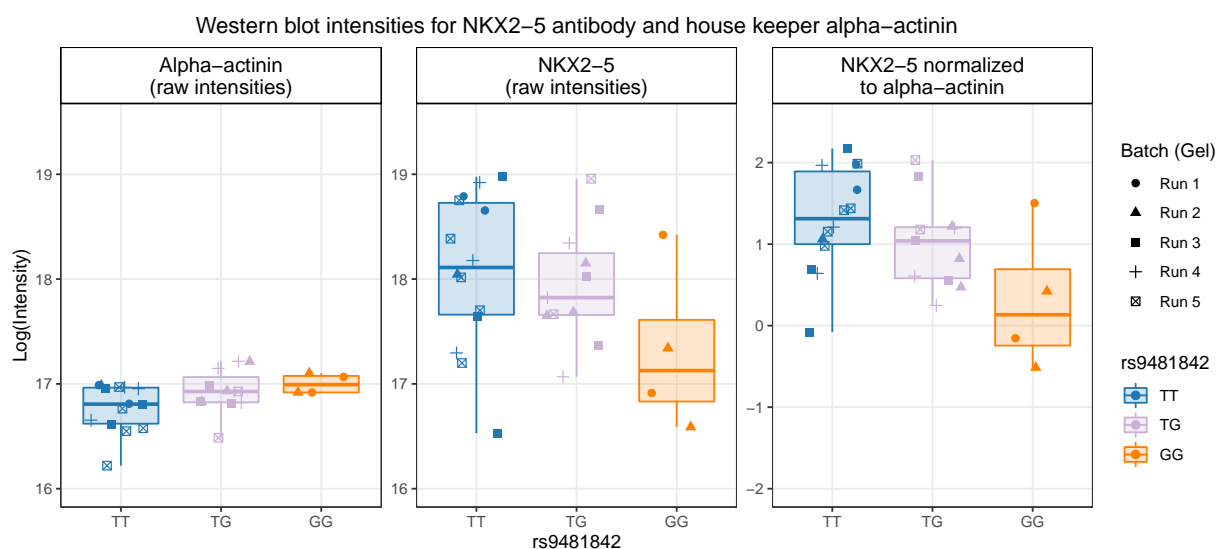

**Figure 9: Replication of the NKX2-5 *trans*-eQTL on proteomics level using Western blot analysis.**

Association of rs9481842 genotypes with NKX2-5 protein expression and the housekeeper alpha-actinin (5 different Western blots,  $N = 29$ ).

In the boxplots, the lower and upper hinges correspond to the first and third quartiles (the 25th and 75th percentiles). The median is denoted by the central line in the box. The upper/lower whisker extends from the hinge to the largest/smallest value no further than  $1.5 \cdot \text{IQR}$  from the hinge.

eQTL, expression quantitative trait loci; IQR, interquartile range;

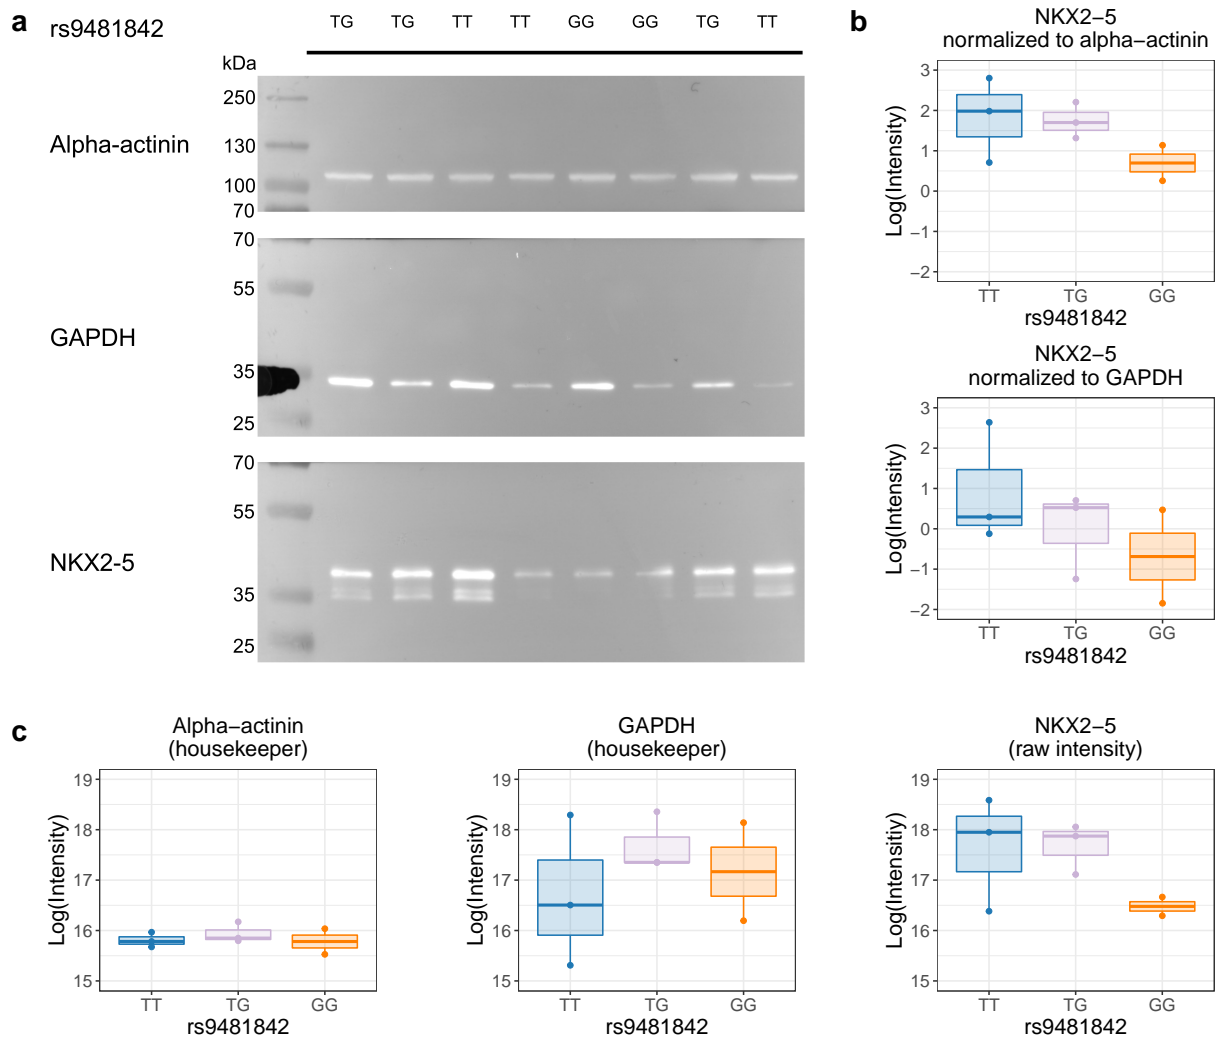

**Figure 10: Western blot analysis for NKX2-5 quantification.**

a: Exemplary additional Western blot image for alpha-actinin (100 kDa), GAPDH (37 kDa), and NKX2-5 (30-42 kDa) for  $N = 8$  biologically independent samples with different genotypes. The membrane was cut in two parts to stain for alpha-actinin and NKX2-5 in parallel. The NKX2-5 membrane was reprobbed with GAPDH antibody after incubation with stripping buffer. In total, five Western blots for NKX2-5 and alpha-actinin were performed to measure  $N = 29$  biologically independent samples (presented in Fig. 9).

b: Quantification of the NKX2-5 *trans*-protein quantitative trait loci for housekeepers alpha-actinin and GAPDH ( $N = 8$  independent biological samples).

c: Raw, absolute quantifications of alpha-actinin, GAPDH and NKX2-5 ( $N = 8$  independent biological samples).

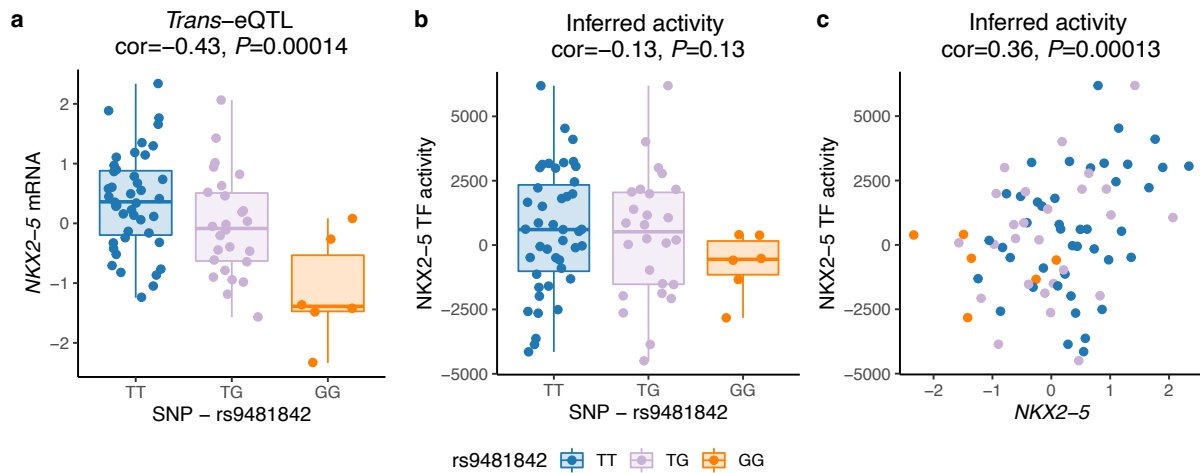

**Figure 11: Causal modeling of NKX2-5 and TF activity.**

a: *Trans*-eQTL rs948182-*NKX2-5* (two-sided Pearson's correlation).

b: Dependence of TF activity on rs9481842 (one-sided Pearson's correlation).

c: Correlation between *NKX2-5* transcript and TF activity (one-sided Pearson's correlation).

In the boxplots, the lower and upper hinges correspond to the first and third quartiles (the 25th and 75th percentiles). The median is denoted by the central line in the box. The upper/lower whisker extends from the hinge to the largest/smallest value no further than  $1.5 \cdot \text{IQR}$  from the hinge.  $N = 75$  independent biological samples are displayed.

eQTL, expression quantitative trait loci; TF, transcription factor; IQR, interquartile range;



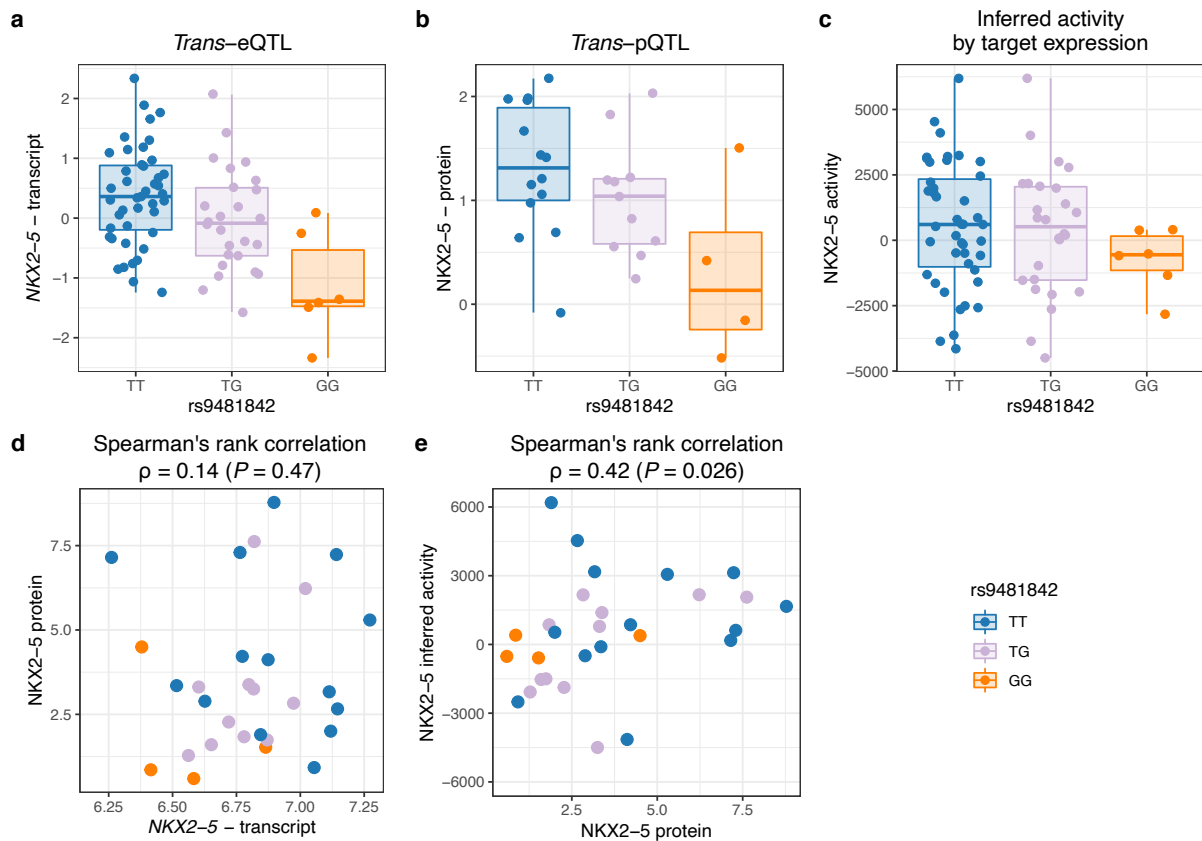

**Figure 12: Inferred transcription factory activity strongly correlates with protein intensity.**

a: *Trans*-eQTL of the SNP rs9481842 and the transcription factor NKX2-5 discovered by our polygenic risk score based enrichment approach for *trans*-QTL gene candidate selection using microarray mRNA quantifications in  $N = 75$  biologically independent samples (two-sided Spearman's rank correlation,  $\rho = -0.38$ ,  $P = 0.00086$ ).

b: *Trans*-pQTL validation of the rs9481842-NKX2-5 *trans*-eQTL in remaining tissue samples using Western blot analysis in  $N = 29$  biologically independent samples (two-sided Spearman's rank correlation,  $\rho = -0.41$ ,  $P = 0.029$ ).

c: Estimated transcription factor activity inferred by genome-wide transcriptomics data and independent tissue or cell type specific annotations in  $N = 75$  biologically independent samples (one-sided Spearman's rank correlation,  $\rho = -0.13$ ,  $P = 0.14$ ).

d: Correlation between the NKX2-5 mRNA and protein in  $N = 29$  biologically independent samples (two-sided Spearman rank correlation).

e: High two-sided Spearman's rank correlation between the inferred NKX2-5 transcription factor activity and actual protein intensities in  $N = 29$  biologically independent samples.

In the boxplots, the lower and upper hinges correspond to the first and third quartiles (the 25th and 75th percentiles). The median is denoted by the central line in the box. The upper/lower whisker extends from the hinge to the largest/smallest value no further than  $1.5 \cdot \text{IQR}$  from the hinge.

eQTL, expression quantitative trait loci; SNP, single-nucleotide polymorphism; QTL, quantitative trait loci; pQTL, protein quantitative trait loci; IQR, interquartile range;

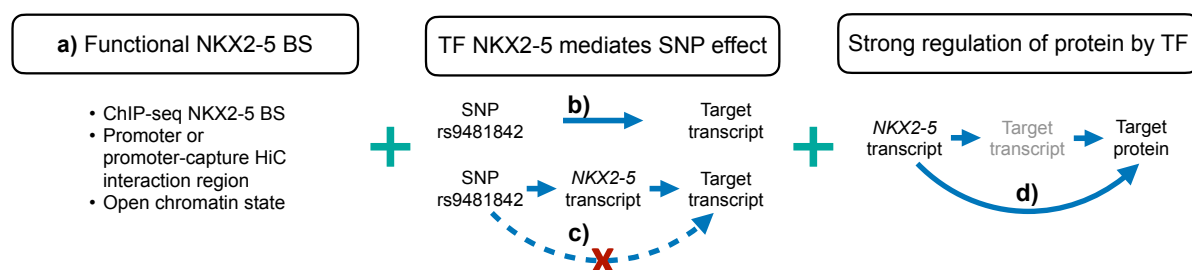

**Figure 13: Definition of functional NKX2-5 targets.**

Functional NKX2-5 targets were derived in a three step process: first, by the presence of a most likely functional TF BS (a), second by a likely regulation of target transcript by the SNP through the TF (b+c), and finally, we checked for strong regulation of the target protein by the TF (d).

TF, transcription factor; BS, binding site; SNP, single-nucleotide polymorphism;

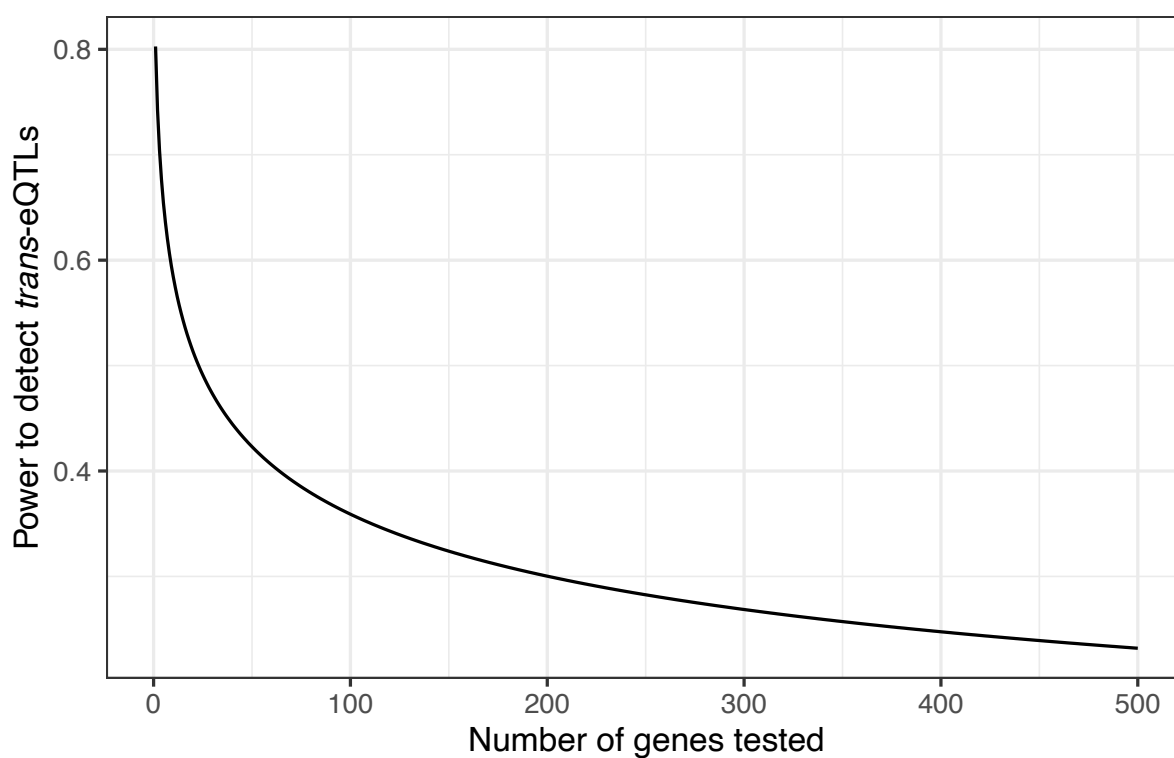

**Figure 14: *Trans*-eQTL power analysis.**

Power analysis for the strongest *trans*-eQTLs (effect size 21.8%), considering 74 samples, 108 SNPs,  $\alpha < 0.05$  and Bonferroni correction. 23 genes correspond to 50% power.

eQTL, expression quantitative trait loci; SNP, single-nucleotide polymorphism; Source data are provided as a Source Data file.

## Supplementary Tables

**Table 1: Correlation between mRNA and protein for *cis*-eQTL genes.**

Comparison of median  $R^2$  and correlation dependent on existing eQTL annotations. Compared are AFHRI genes non *cis*-eQTL vs. *cis*-eQTL genes, AFHRI genes without an *cis*-eQTL in the GTEx atrial appendage data vs. genes with eQTL in GTEx[1] and Hapmap LCL[2] data without and with an eQTL for the LCL computations.

eQTL, expression quantitative trait score; LCL, lymphoblastoid cell line; GTEx, Genotype-Tissue Expression project; Source data are provided as a Source Data file.

| Measure             | AFHRI cohort         |                  | AFHRI cohort              |                       | Hapmap LCL data          |                      |
|---------------------|----------------------|------------------|---------------------------|-----------------------|--------------------------|----------------------|
|                     | non <i>cis</i> -eQTL | <i>cis</i> -eQTL | non GTEx <i>cis</i> -eQTL | GTEx <i>cis</i> -eQTL | LCL non <i>cis</i> -eQTL | LCL <i>cis</i> -eQTL |
| Median( $R^2$ )     | 0.0265               | 0.0378           | 0.0243                    | 0.0354                | 0.0205                   | 0.0376               |
| Mean( $R^2$ )       | 0.0634               | 0.0868           | 0.0604                    | 0.0771                | 0.0466                   | 0.0798               |
| Median(correlation) | 0.145                | 0.174            | 0.137                     | 0.175                 | 0.105                    | 0.176                |
| Mean(correlation)   | 0.163                | 0.195            | 0.156                     | 0.188                 | 0.110                    | 0.185                |

**Table 2: Overlap of *cis*-eQTLs and pQTLs in other studies.**

Comparison of *cis*-eQTL/pQTL overlap in previously published studies compared to our dataset. Information about plasma pQTL overlap with GTEx eQTLs is either based on the Sun et al. manuscript (marked with "paper"), or derived from the Sun et al. Supplementary Table S8[3] (marked "suppl."). eQTL, expression quantitative trait loci; pQTL, protein quantitative trait loci; FDR, false discovery rate; LCL, lymphoblastoid cell line; GTEx, Genotype-Tissue Expression project;

| Cohort / datasets                                           | Overlap of                               |                                             |
|-------------------------------------------------------------|------------------------------------------|---------------------------------------------|
|                                                             | <i>cis</i> -pQTLs with <i>cis</i> -eQTLs | <i>cis</i> -eQTLs with <i>cis</i> -pQTLs    |
| AFHRI cohort                                                |                                          |                                             |
| QTL genes                                                   | n=21 (24%)                               | n=21 (17%)                                  |
| AFHRI cohort                                                |                                          |                                             |
| SNP-gene pairs                                              | n=642 (16%)                              | n= 642 (14%)                                |
| LCL Hause et al.[4]:                                        | none at FDR<0.05                         | none at FDR<0.05                            |
| LCL Battle et al.[2]:                                       |                                          |                                             |
| SNP-gene pairs                                              | 67%                                      | 35%                                         |
| Plasma pQTL Sun et al.[3] to all GTEx tissues:              |                                          |                                             |
| Lead SNPs for same gene, high LD regions ( $r^2 \geq 0.8$ ) | n=224 (40%) (paper)                      |                                             |
| All sentinel SNPs listed in the Sun et al. supplements      | n=320 (~40%) (suppl.)                    |                                             |
| Plasma pQTL Sun et al.[3] to GTEx whole blood:              |                                          | <i>cis</i> -eQTL: $P < 1.5 \times 10^{-11}$ |
| Lead SNPs for same gene, high LD regions ( $r^2 \geq 0.8$ ) | n=117 (19%) (paper)                      | 12.2% (paper)                               |
| All sentinel SNPs listed in the Sun et al. supplements      | n=152 (~19%) (suppl.)                    |                                             |
| Plasma pQTL Sun et al.[3] to GTEx heart tissue:             |                                          |                                             |
| Lead SNPs for same gene, high LD regions ( $r^2 \geq 0.8$ ) |                                          | <i>cis</i> -eQTL: $P < 1.5 \times 10^{-11}$ |
| All sentinel SNPs listed in the Sun et al. supplements      | n=60 (~7.5%) (suppl.)                    | 14.8% (paper)                               |
| Plasma pQTL Sun et al.[3] to GTEx liver:                    |                                          |                                             |
| Lead SNPs for same gene, high LD regions ( $r^2 \geq 0.8$ ) | n=70 () (paper)                          |                                             |
| All sentinel SNPs listed in the Sun et al. supplements      | n=126 (~16%) (suppl.)                    |                                             |
| Plasma pQTL Sun et al.[3] to GTEx monocytes:                |                                          | <i>cis</i> -eQTL: $P < 1.5 \times 10^{-11}$ |
| Lead SNPs for same gene, high LD regions ( $r^2 \geq 0.8$ ) | n=52 () (paper)                          | 14.7% (paper)                               |
| All sentinel SNPs listed in the Sun et al. supplements      | n=94 (~12%) (suppl.)                     |                                             |

**Table 3: Summary of tested data and discovered *cis*-quantitative trait loci.**

Significant *cis*-QTLs in heart atrial appendage tissue for mRNA and protein measurements. Two-sided *T* tests were evaluated and FDR (according to Benjamini-Hochberg procedure) was assessed per omic to account for multiple comparisons. Results for  $\text{FDR} < 0.05$  and  $P < 1 \times 10^{-5}$  are listed. Loci denote the number of independent loci derived by LD-clumping.

QTL, quantitative trait loci; FDR, false discovery rate; LD, linkage disequilibrium; eQTL, expression quantitative trait loci; pQTL, protein quantitative trait loci; ratioQTL, ratio quantitative trait loci; res eQTL, residual expression quantitative trait loci; res pQTL, residual protein quantitative trait loci; N, sample size; Source data are provided as a Source Data file.

|                  | SNPs      | Tested:    |        |  | FDR<0.05: |       |       | $P < 1 \times 10^{-5}$ : |       |      | N  |
|------------------|-----------|------------|--------|--|-----------|-------|-------|--------------------------|-------|------|----|
|                  |           | Pairs      | Genes  |  | Pairs     | Genes | Loci  | Pairs                    | Genes | Loci |    |
| eQTL             | 4,861,118 | 56,139,851 | 16,306 |  | 57,403    | 1,058 | 1,657 | 40,267                   | 552   | 870  | 75 |
| pQTL             | 2,323,504 | 4,508,654  | 1,337  |  | 4,081     | 91    | 139   | 2,543                    | 45    | 71   | 75 |
| ratioQTL         | 2,249,758 | 4,198,168  | 1,243  |  | 563       | 16    | 23    | 575                      | 18    | 27   | 66 |
| res eQTL         | 2,249,758 | 4,198,168  | 1,243  |  | 2,261     | 63    | 99    | 1,504                    | 41    | 62   | 66 |
| res pQTL         | 2,249,758 | 4,198,168  | 1,243  |  | 1,316     | 34    | 45    | 1,194                    | 29    | 38   | 66 |
| Shared eQTL/pQTL | 2,249,758 | 4,198,168  | 1,243  |  | 430       | 11    | 14    |                          |       |      | 66 |
| Independent eQTL | 2,249,758 | 4,198,168  | 1,243  |  | 1,593     | 37    | 62    |                          |       |      | 66 |
| Independent pQTL | 2,249,758 | 4,198,168  | 1,243  |  | 1,083     | 21    | 25    |                          |       |      | 66 |

**Table 4: *Cis*-QTLs overlapping with GWAS hits.**

Number of significant *cis*-QTLs (FDR < 0.05) overlapping with variants annotated to cardiovascular traits in the GWAS catalog (or proxy with  $R^2 > 0.8$ ).

QTL, quantitative trait loci; GWAS, genome-wide association study; COPD, Chronic obstructive pulmonary disease; eQTL, expression quantitative trait loci; pQTL, protein quantitative trait loci; ratioQTL, ratio quantitative trait loci; res pQTL, protein residual quantitative trait loci; res eQTL, expression residual quantitative trait loci; Source data are provided as a Source Data file.

| Trait                                         | eQTL | pQTL | ratioQTL | res pQTL | res eQTL |
|-----------------------------------------------|------|------|----------|----------|----------|
| Atrial fibrillation                           | 15   | 3    | 0        | 0        | 0        |
| Pulse pressure                                | 12   | 1    | 0        | 0        | 0        |
| Coronary artery disease                       | 5    | 0    | 0        | 0        | 0        |
| QT interval                                   | 5    | 0    | 0        | 0        | 0        |
| Creatine kinase levels                        | 1    | 1    | 1        | 1        | 0        |
| COPD or resting heart rate (pleiotropy)       | 2    | 1    | 0        | 0        | 0        |
| PR interval                                   | 3    | 0    | 0        | 0        | 0        |
| Serum uric acid levels                        | 2    | 0    | 0        | 0        | 1        |
| Incident atrial fibrillation                  | 1    | 1    | 0        | 0        | 0        |
| Large artery stroke                           | 2    | 0    | 0        | 0        | 0        |
| Sudden cardiac arrest                         | 2    | 0    | 0        | 0        | 0        |
| Age-related disease endophenotypes            | 1    | 0    | 0        | 0        | 0        |
| Birdshot chorioretinopathy                    | 1    | 0    | 0        | 0        | 0        |
| Carotid plaque burden (smoking interaction)   | 1    | 0    | 0        | 0        | 0        |
| Circulating myeloperoxidase levels (serum)    | 1    | 0    | 0        | 0        | 0        |
| Conotruncal heart defects (inherited effects) | 1    | 0    | 0        | 0        | 0        |
| Coronary artery disease (...)                 | 1    | 0    | 0        | 0        | 0        |
| Heart rate                                    | 1    | 0    | 0        | 0        | 0        |
| Hematology traits                             | 1    | 0    | 0        | 0        | 0        |
| Homocysteine levels                           | 1    | 0    | 0        | 0        | 0        |
| Ischemic stroke                               | 0    | 0    | 0        | 1        | 0        |
| Left atrial antero-posterior diameter         | 1    | 0    | 0        | 0        | 0        |
| Migraine                                      | 1    | 0    | 0        | 0        | 0        |
| Peripheral arterial disease (...)             | 1    | 0    | 0        | 0        | 0        |
| Prevalent atrial fibrillation                 | 1    | 0    | 0        | 0        | 0        |
| QRS complex (Sokolow-Lyon)                    | 1    | 0    | 0        | 0        | 0        |
| Resting heart rate                            | 1    | 0    | 0        | 0        | 0        |
| RR interval (heart rate)                      | 1    | 0    | 0        | 0        | 0        |
| Venous thromboembolism                        | 1    | 0    | 0        | 0        | 0        |

**Table 5: Overlap of *cis*-QTLs with GWAS loci for atrial fibrillation.**

QTL hits that overlap with GWAS hits for atrial fibrillation in the GWAS catalog (or proxy with  $R^2 < 0.8$ ).

QTL, quantitative trait loci; GWAS, genome-wide association study; eQTL, expression quantitative trait loci; pQTL, protein quantitative trait loci; Source data are provided as a Source Data file.

| Region  | QTL variant | Reported variant | Reported gene                     | QTL gene       | QTL type | Pubmed-ID | First author      |
|---------|-------------|------------------|-----------------------------------|----------------|----------|-----------|-------------------|
| 2p13.3  | rs13028508  | rs10165883       | <i>SNRNP27</i>                    | <i>SNRNP27</i> | eQTL     | 29892015  | Roselli C         |
| 10q22.2 | rs10824026  | rs10824026       | <i>SYNPO2L</i>                    | <i>MYOZ1</i>   | eQTL     | 29290336  | Nielsen JB        |
| 3q22.3  | rs6791611   | rs1278493        | <i>PPP2R3A</i>                    | <i>PCCB</i>    | eQTL     | 30061737  | Nielsen JB        |
| 5q31.2  | rs9327807   | rs2040862        | <i>WNT8A, NPY6R, MYOT, FAM13B</i> | <i>FAM13B</i>  | eQTL     | 30061737  | Nielsen JB        |
| 2q33.1  | rs159321    | rs295114         | <i>SPATS2L</i>                    | <i>SPATS2L</i> | eQTL     | 29892015  | Roselli C         |
| 2q33.1  | rs1347551   | rs3820888        | <i>SPATS2L</i>                    | <i>SPATS2L</i> | eQTL     | 30061737  | Nielsen JB        |
| 3q26.33 | rs2339798   | rs4855074        | <i>GNB4</i>                       | <i>GNB4</i>    | eQTL     | 29892015  | Roselli C         |
| 3q26.33 | rs2339798   | rs4855075        | <i>GNB4</i>                       | <i>GNB4</i>    | eQTL     | 29892015  | Roselli C         |
| 1q32.1  | rs951366    | rs4951258        | <i>NUCKS1, SLC41A1</i>            | <i>NUCKS1</i>  | eQTL     | 30061737  | Nielsen JB        |
| 1q32.1  | rs951366    | rs4951261        | <i>NUCKS1</i>                     | <i>NUCKS1</i>  | eQTL     | 29892015  | Roselli C         |
| 10q22.2 | rs3740293   | rs60212594       | <i>SYNPO2L</i>                    | <i>MYOZ1</i>   | eQTL     | 29892015  | Roselli C         |
| 10q22.2 | rs10824026  | rs6480708        | <i>SYNPO2L</i>                    | <i>MYOZ1</i>   | eQTL     | 29892015  | Roselli C         |
| 2p13.3  | rs13028508  | rs6546550        | <i>ANXA4/GMCL1</i>                | <i>SNRNP27</i> | eQTL     | 28416818  | Christophersen IE |
| 2p13.3  | rs13028508  | rs6546553        | <i>GMCL1</i>                      | <i>SNRNP27</i> | eQTL     | 29892015  | Roselli C         |
| 2p13.3  | rs13028508  | rs6747542        | <i>GMCL1, ANXA4</i>               | <i>SNRNP27</i> | eQTL     | 30061737  | Nielsen JB        |
| 10q22.2 | rs10824026  | rs7394190        | <i>SYNPO2L</i>                    | <i>MYOZ1</i>   | eQTL     | 28416818  | Christophersen IE |
| 1q32.1  | rs951366    | rs951366         | <i>NUCKS1</i>                     | <i>NUCKS1</i>  | eQTL     | 29892015  | Roselli C         |
| 10q22.2 | rs10824026  | rs10824026       | <i>SYNPO2L</i>                    | <i>MYOZ1</i>   | pQTL     | 28416818  | Christophersen IE |
| 10q22.2 | rs3740293   | rs60212594       | <i>SYNPO2L</i>                    | <i>MYOZ1</i>   | pQTL     | 29892015  | Roselli C         |
| 10q22.2 | rs12570126  | rs6480708        | <i>SYNPO2L</i>                    | <i>MYOZ1</i>   | pQTL     | 29892015  | Roselli C         |
| 10q22.2 | rs12570126  | rs7394190        | <i>SYNPO2L</i>                    | <i>MYOZ1</i>   | pQTL     | 28416818  | Christophersen IE |

**Table 6: Top eQTS genes.**

Linear regression results of transcript expression associating with the polygenic risk score for AF. Two-sided  $T$  tests were derived from a linear model with covariates and *cis*-SNPs. As  $T$  values were further used for ranking genes and not to assess statistical significance, no adjustments for multiple comparisons were applied.

eQTS, expression quantitative trait score; AF, atrial fibrillation; SNP, single-nucleotide polymorphism; N, sample size; df, degrees of freedom; Source data are provided as a Source Data file.

| Gene                | $\beta$ | $T$ value | $P$ value | N  | df |
|---------------------|---------|-----------|-----------|----|----|
| <i>LOC105377927</i> | 0.311   | 4.10      | 0.000116  | 74 | 65 |
| <i>SEMA3F</i>       | -0.254  | -3.95     | 0.000196  | 74 | 65 |
| <i>LOC105371436</i> | -0.306  | -3.89     | 0.000240  | 74 | 65 |
| <i>STEAP3</i>       | -0.343  | -3.80     | 0.000326  | 74 | 65 |
| <i>FBXL7</i>        | 0.201   | 3.69      | 0.000465  | 74 | 65 |
| <i>VTN</i>          | -0.415  | -3.68     | 0.000476  | 74 | 64 |
| <i>WDR82</i>        | 0.159   | 3.66      | 0.000501  | 74 | 65 |
| <i>MIR544A</i>      | 0.577   | 3.62      | 0.000570  | 74 | 65 |
| <i>NR1I2</i>        | 0.266   | 3.59      | 0.000639  | 74 | 65 |
| <i>SNORD91A</i>     | 0.384   | 3.58      | 0.000664  | 74 | 65 |
| <i>PLCL1</i>        | 0.383   | 3.57      | 0.000668  | 74 | 65 |
| <i>LOC105374629</i> | 0.218   | 3.53      | 0.000758  | 74 | 65 |
| <i>LOC729080</i>    | 0.282   | 3.53      | 0.000780  | 74 | 65 |
| <i>OIP5-AS1</i>     | 0.225   | 3.52      | 0.000805  | 74 | 65 |
| <i>TXNDC12-AS1</i>  | -0.330  | -3.50     | 0.000846  | 74 | 65 |
| <i>CRELD2</i>       | -0.189  | -3.48     | 0.000896  | 74 | 65 |
| <i>CEP85L</i>       | 0.226   | 3.45      | 0.00100   | 74 | 65 |
| <i>FKBP11</i>       | -0.330  | -3.41     | 0.00112   | 74 | 65 |
| <i>SLC22A24</i>     | -0.268  | -3.39     | 0.00119   | 74 | 65 |
| <i>VAT1L</i>        | -0.520  | -3.39     | 0.00119   | 74 | 65 |
| <i>TFIP11</i>       | 0.242   | 3.37      | 0.00128   | 74 | 65 |
| <i>LOC105377151</i> | 0.283   | 3.36      | 0.00131   | 74 | 65 |
| <i>TRIM43</i>       | 0.239   | 3.36      | 0.00132   | 74 | 65 |
| <i>MIR376A2</i>     | 0.481   | 3.35      | 0.00133   | 74 | 65 |
| <i>UPK1A-AS1</i>    | 0.277   | 3.35      | 0.00134   | 74 | 65 |
| <i>WAC-AS1</i>      | 0.226   | 3.33      | 0.00142   | 74 | 65 |
| <i>LOC101928257</i> | 0.212   | 3.33      | 0.00145   | 74 | 65 |
| <i>LOC105374674</i> | 0.230   | 3.31      | 0.00152   | 74 | 65 |
| <i>LINC0002</i>     | -0.196  | -3.31     | 0.00152   | 74 | 65 |
| <i>FAM78A</i>       | 0.219   | 3.31      | 0.00152   | 74 | 64 |
| <i>CFAP57</i>       | -0.232  | -3.30     | 0.00157   | 74 | 65 |
| <i>TMPRSS9</i>      | -0.221  | -3.29     | 0.00163   | 74 | 65 |
| <i>KLKB1</i>        | 0.616   | 3.27      | 0.00171   | 74 | 65 |
| <i>RUNDC3A-AS1</i>  | 0.255   | 3.27      | 0.00173   | 74 | 65 |
| <i>SGK2</i>         | -0.275  | -3.24     | 0.00191   | 74 | 65 |
| <i>C1orf56</i>      | 0.273   | 3.23      | 0.00195   | 74 | 65 |



**Table 7: Enriched GO terms for eQTS GSEA.**

GSEA results on eQTS *T* value rankings. Shown are all GO terms enriched at  $FDR < 0.05$  (Benjamini-Hochberg procedure to account for multiple comparisons of the two-sided, permutation-derived *P* values). Size refers to the number of genes in the gene set after removing those not evaluated for eQTS. Full summary statistics on all tables are available under <https://doi.org/10.5281/zenodo.5080229>

GO, Gene Ontology; eQTS, expression quantitative trait score; GSEA, gene set enrichment analysis; NES, normalized enrichment score; FDR, false discovery rate; Source data are provided as a Source Data file.

| GO ID      | GO term                                                                                          | NES   | <i>P</i> value        | FDR     | Size |
|------------|--------------------------------------------------------------------------------------------------|-------|-----------------------|---------|------|
| GO:0006091 | Generation of precursor metabolites and energy                                                   | 2.03  | $1.61 \times 10^{-5}$ | 0.00397 | 268  |
| GO:0003012 | Muscle system process                                                                            | 1.85  | $1.61 \times 10^{-5}$ | 0.00397 | 264  |
| GO:0015980 | Energy derivation by oxidation of organic compounds                                              | 2.21  | $1.65 \times 10^{-5}$ | 0.00397 | 197  |
| GO:0045333 | Cellular respiration                                                                             | 2.4   | $1.69 \times 10^{-5}$ | 0.00397 | 129  |
| GO:0022900 | Electron transport chain                                                                         | 2.17  | $1.74 \times 10^{-5}$ | 0.00397 | 86   |
| GO:0003015 | Heart process                                                                                    | 2.17  | $1.75 \times 10^{-5}$ | 0.00397 | 80   |
| GO:0006119 | Oxidative phosphorylation                                                                        | 2.35  | $1.76 \times 10^{-5}$ | 0.00397 | 75   |
| GO:0006942 | Regulation of striated muscle contraction                                                        | 2.13  | $1.76 \times 10^{-5}$ | 0.00397 | 74   |
| GO:0055117 | Regulation of cardiac muscle contraction                                                         | 2.11  | $1.77 \times 10^{-5}$ | 0.00397 | 63   |
| GO:0033108 | Mitochondrial respiratory chain complex assembly                                                 | 2.26  | $1.78 \times 10^{-5}$ | 0.00397 | 57   |
| GO:0097031 | Mitochondrial respiratory chain complex I biogenesis                                             | 2.38  | $1.80 \times 10^{-5}$ | 0.00397 | 46   |
| GO:0009060 | Aerobic respiration                                                                              | 2.32  | $1.80 \times 10^{-5}$ | 0.00397 | 48   |
| GO:0002455 | Humoral immune response mediated by circulating immunoglobulin                                   | -2.22 | $2.25 \times 10^{-5}$ | 0.00397 | 46   |
| GO:0006956 | Complement activation                                                                            | -2.27 | $2.27 \times 10^{-5}$ | 0.00397 | 52   |
| GO:0019724 | B cell mediated immunity                                                                         | -2.02 | $2.32 \times 10^{-5}$ | 0.00397 | 76   |
| GO:0072599 | Establishment of protein localization to endoplasmic reticulum                                   | -2.29 | $2.36 \times 10^{-5}$ | 0.00397 | 90   |
| GO:0030216 | Keratinocyte differentiation                                                                     | -1.99 | $2.37 \times 10^{-5}$ | 0.00397 | 97   |
| GO:0070972 | Protein localization to endoplasmic reticulum                                                    | -2.07 | $2.40 \times 10^{-5}$ | 0.00397 | 109  |
| GO:0006413 | translational initiation                                                                         | -1.93 | $2.44 \times 10^{-5}$ | 0.00397 | 127  |
| GO:0006612 | Protein targeting to membrane                                                                    | -2.03 | $2.46 \times 10^{-5}$ | 0.00397 | 141  |
| GO:0006959 | Humoral immune response                                                                          | -1.77 | $2.48 \times 10^{-5}$ | 0.00397 | 153  |
| GO:0008544 | Epidermis development                                                                            | -1.69 | $2.60 \times 10^{-5}$ | 0.00398 | 244  |
| GO:1903034 | Regulation of response to wounding                                                               | -1.57 | $2.80 \times 10^{-5}$ | 0.0041  | 386  |
| GO:0090257 | Regulation of muscle system process                                                              | 1.79  | $3.31 \times 10^{-5}$ | 0.00465 | 184  |
| GO:2000257 | Regulation of protein activation cascade                                                         | -2.16 | $4.43 \times 10^{-5}$ | 0.00537 | 33   |
| GO:0031424 | Keratinization                                                                                   | -2.05 | $4.51 \times 10^{-5}$ | 0.00537 | 48   |
| GO:0002920 | Regulation of humoral immune response                                                            | -2.07 | $4.51 \times 10^{-5}$ | 0.00537 | 47   |
| GO:0072376 | Protein activation cascade                                                                       | -1.95 | $4.63 \times 10^{-5}$ | 0.00537 | 74   |
| GO:0072521 | Purine-containing compound metabolic process                                                     | 1.59  | $4.70 \times 10^{-5}$ | 0.00537 | 356  |
| GO:0006936 | Muscle contraction                                                                               | 1.79  | $4.91 \times 10^{-5}$ | 0.00537 | 217  |
| GO:0009141 | Nucleoside triphosphate metabolic process                                                        | 1.79  | $4.95 \times 10^{-5}$ | 0.00537 | 201  |
| GO:0072350 | Tricarboxylic acid metabolic process                                                             | 2.11  | $5.43 \times 10^{-5}$ | 0.00571 | 37   |
| GO:0006941 | Striated muscle contraction                                                                      | 1.93  | $6.95 \times 10^{-5}$ | 0.00706 | 90   |
| GO:1903115 | Regulation of actin filament-based movement                                                      | 2.08  | $7.28 \times 10^{-5}$ | 0.00706 | 32   |
| GO:0009913 | Epidermal cell differentiation                                                                   | -1.82 | $7.34 \times 10^{-5}$ | 0.00706 | 137  |
| GO:0006937 | Regulation of muscle contraction                                                                 | 1.84  | $8.45 \times 10^{-5}$ | 0.0079  | 139  |
| GO:0048738 | Cardiac muscle tissue development                                                                | 1.82  | $1.02 \times 10^{-4}$ | 0.00924 | 129  |
| GO:0055006 | Cardiac cell development                                                                         | 1.99  | $1.08 \times 10^{-4}$ | 0.00955 | 47   |
| GO:0010881 | Regulation of cardiac muscle contraction by regulation of the release of sequestered calcium ion | 2.08  | $1.11 \times 10^{-4}$ | 0.00962 | 18   |
| GO:0000184 | Nuclear-transcribed mRNA catabolic process, nonsense-mediated decay                              | -1.8  | $1.19 \times 10^{-4}$ | 0.01    | 103  |
| GO:0050727 | Regulation of inflammatory response                                                              | -1.59 | $1.33 \times 10^{-4}$ | 0.0109  | 274  |
| GO:0086004 | Regulation of cardiac muscle cell contraction                                                    | 2.01  | $1.47 \times 10^{-4}$ | 0.0117  | 27   |
| GO:0002443 | Leukocyte mediated immunity                                                                      | -1.69 | $1.49 \times 10^{-4}$ | 0.0117  | 160  |
| GO:0090150 | Establishment of protein localization to membrane                                                | -1.6  | $1.56 \times 10^{-4}$ | 0.0119  | 241  |
| GO:0000209 | Protein polyubiquitination                                                                       | 1.65  | $1.63 \times 10^{-4}$ | 0.0122  | 229  |
| GO:0055086 | Nucleobase-containing small molecule metabolic process                                           | 1.47  | $1.83 \times 10^{-4}$ | 0.0134  | 476  |
| GO:0042787 | Protein ubiquitination involved in ubiquitin-dependent protein catabolic process                 | 1.75  | $2.20 \times 10^{-4}$ | 0.0155  | 126  |

| GO ID      | GO term                                                                                     | NES   | P value               | FDR    | Size |
|------------|---------------------------------------------------------------------------------------------|-------|-----------------------|--------|------|
| GO:0010882 | Regulation of cardiac muscle contraction by calcium ion signaling                           | 2.03  | $2.21 \times 10^{-4}$ | 0.0155 | 22   |
| GO:0098901 | Regulation of cardiac muscle cell action potential                                          | 2.01  | $2.41 \times 10^{-4}$ | 0.0165 | 19   |
| GO:1901657 | Glycosyl compound metabolic process                                                         | 1.56  | $2.53 \times 10^{-4}$ | 0.017  | 327  |
| GO:0002673 | Regulation of acute inflammatory response                                                   | -1.84 | $2.78 \times 10^{-4}$ | 0.018  | 69   |
| GO:0009123 | Nucleoside monophosphate metabolic process                                                  | 1.63  | $2.78 \times 10^{-4}$ | 0.018  | 219  |
| GO:0030855 | Epithelial cell differentiation                                                             | -1.43 | $2.89 \times 10^{-4}$ | 0.0184 | 469  |
| GO:0008016 | Regulation of heart contraction                                                             | 1.61  | $3.29 \times 10^{-4}$ | 0.0201 | 205  |
| GO:0003013 | Circulatory system process                                                                  | 1.53  | $3.31 \times 10^{-4}$ | 0.0201 | 343  |
| GO:0070252 | Actin-mediated cell contraction                                                             | 1.86  | $3.35 \times 10^{-4}$ | 0.0201 | 70   |
| GO:0030048 | Actin filament-based movement                                                               | 1.78  | $3.65 \times 10^{-4}$ | 0.0213 | 89   |
| GO:0010880 | Regulation of release of sequestered calcium ion into cytosol by sarcoplasmic reticulum     | 1.97  | $3.68 \times 10^{-4}$ | 0.0213 | 24   |
| GO:0002027 | Regulation of heart rate                                                                    | 1.82  | $4.37 \times 10^{-4}$ | 0.0249 | 82   |
| GO:0060306 | Regulation of membrane repolarization                                                       | 1.94  | $4.75 \times 10^{-4}$ | 0.0267 | 28   |
| GO:0040029 | Regulation of gene expression, epigenetic                                                   | 1.61  | $5.30 \times 10^{-4}$ | 0.0292 | 193  |
| GO:0043588 | Skin development                                                                            | -1.57 | $6.11 \times 10^{-4}$ | 0.0332 | 202  |
| GO:0002064 | Epithelial cell development                                                                 | -1.58 | $6.54 \times 10^{-4}$ | 0.0349 | 177  |
| GO:0044033 | Multi-organism metabolic process                                                            | -1.66 | $6.80 \times 10^{-4}$ | 0.0358 | 121  |
| GO:0045165 | Cell fate commitment                                                                        | -1.54 | $6.95 \times 10^{-4}$ | 0.036  | 218  |
| GO:0061448 | Connective tissue development                                                               | -1.57 | $7.31 \times 10^{-4}$ | 0.0367 | 183  |
| GO:0060968 | Regulation of gene silencing                                                                | 1.85  | $7.37 \times 10^{-4}$ | 0.0367 | 47   |
| GO:0002063 | Chondrocyte development                                                                     | -1.99 | $7.42 \times 10^{-4}$ | 0.0367 | 21   |
| GO:0033561 | Regulation of water loss via skin                                                           | -2    | $7.80 \times 10^{-4}$ | 0.0381 | 18   |
| GO:0002066 | Columnar/cuboidal epithelial cell development                                               | -1.86 | $8.11 \times 10^{-4}$ | 0.0385 | 45   |
| GO:0009896 | Positive regulation of catabolic process                                                    | 1.46  | $8.12 \times 10^{-4}$ | 0.0385 | 372  |
| GO:0060537 | Muscle tissue development                                                                   | 1.52  | $8.42 \times 10^{-4}$ | 0.0388 | 252  |
| GO:0061136 | Regulation of proteasomal protein catabolic process                                         | 1.6   | $8.50 \times 10^{-4}$ | 0.0388 | 167  |
| GO:0018149 | Peptide cross-linking                                                                       | -1.82 | $8.63 \times 10^{-4}$ | 0.0388 | 54   |
| GO:0061035 | Regulation of cartilage development                                                         | -1.82 | $8.65 \times 10^{-4}$ | 0.0388 | 57   |
| GO:0099623 | Regulation of cardiac muscle cell membrane repolarization cytosol by sarcoplasmic reticulum | 1.92  | $9.64 \times 10^{-4}$ | 0.0427 | 19   |
| GO:0061061 | Muscle structure development                                                                | 1.44  | $9.92 \times 10^{-4}$ | 0.0429 | 399  |
| GO:1903522 | Regulation of blood circulation                                                             | 1.5   | $9.95 \times 10^{-4}$ | 0.0429 | 273  |
| GO:0045669 | Positive regulation of osteoblast differentiation                                           | -1.8  | $1.02 \times 10^{-3}$ | 0.0437 | 56   |
| GO:0050818 | Regulation of coagulation                                                                   | -1.7  | $1.05 \times 10^{-3}$ | 0.0439 | 85   |
| GO:0014013 | Regulation of gliogenesis                                                                   | -1.71 | $1.06 \times 10^{-3}$ | 0.0439 | 87   |

**Table 8: Top pQTS genes.**

Linear regression results of protein expression associating with the polygenic risk score for AF. Two-sided  $T$  tests were derived from a linear model with covariates and *cis*-SNPs. As  $T$  values were further used for ranking genes and not to assess statistical significance, no adjustment for multiple comparisons was applied.

pQTS, protein quantitative trait score; AF, atrial fibrillation; SNP, single-nucleotide polymorphism; N, sample size; df, degrees of freedom; Source data are provided as a Source Data file.

| Gene      | $\beta$ | $T$ value | $P$ value | $N$ | df |
|-----------|---------|-----------|-----------|-----|----|
| NAMPT     | -0.158  | -3.07     | 0.00315   | 73  | 63 |
| MARK1     | -0.176  | -2.58     | 0.0121    | 73  | 64 |
| GYG1      | 0.0941  | 2.57      | 0.0125    | 73  | 64 |
| AOC3      | 0.157   | 2.51      | 0.0146    | 73  | 64 |
| PGM2      | -0.184  | -2.46     | 0.0167    | 73  | 64 |
| CD36      | 0.0986  | 2.45      | 0.0171    | 73  | 64 |
| CDIPT     | 0.126   | 2.40      | 0.0195    | 73  | 64 |
| RPL37AP8  | 0.214   | 2.35      | 0.0219    | 73  | 64 |
| RPL37L    | 0.214   | 2.35      | 0.0219    | 73  | 64 |
| RAB2A     | 0.113   | 2.32      | 0.0235    | 73  | 64 |
| RPS4X     | 0.102   | 2.27      | 0.0263    | 73  | 64 |
| RPL39     | -0.148  | -2.23     | 0.0292    | 73  | 64 |
| MYO1C     | 0.0818  | 2.20      | 0.0311    | 73  | 64 |
| PCBP2     | -0.0961 | -2.20     | 0.0314    | 73  | 64 |
| ERP44     | -0.0954 | -2.17     | 0.0337    | 73  | 64 |
| BLVRA     | -0.110  | -2.15     | 0.0350    | 73  | 64 |
| NIPSNAP3A | -0.0955 | -2.13     | 0.0376    | 73  | 61 |
| XRCC6     | -0.0651 | -2.06     | 0.0431    | 73  | 64 |
| CLIC4     | -0.0771 | -2.04     | 0.0460    | 73  | 64 |
| BCL11B    | 0.139   | 2.02      | 0.0479    | 73  | 64 |
| TALDO1    | -0.0884 | -2.01     | 0.0488    | 73  | 64 |
| MAP1LC3B  | 0.121   | 2.00      | 0.0495    | 73  | 64 |
| MAP1LC3B2 | 0.121   | 2.00      | 0.0495    | 73  | 64 |
| RPL13A    | -0.170  | -2.00     | 0.0498    | 73  | 64 |

**Table 9: Enriched GO term for pQTS GSEA.**

GSEA results on pQTS  $T$  value rankings. Shown is the GO term enriched at  $FDR < 0.05$  (Benjamini-Hochberg procedure to account for multiple comparisons of the two-sided, permutation-derived  $P$  values). Size refers to the number of genes in the gene set after removing those not evaluated for pQTS.

GO, Gene Ontology; pQTS, protein quantitative trait score; GSEA, gene set enrichment analysis; NES, normalized enrichment score; FDR, false discovery rate; Source data are provided as a Source Data file.

| GO ID      | GO term                          | NES   | $P$ value             | FDR    | Size |
|------------|----------------------------------|-------|-----------------------|--------|------|
| GO:0044281 | Small molecule metabolic process | -1.68 | $1.34 \times 10^{-5}$ | 0.0270 | 332  |

**Table 10: Transcriptomics core gene candidates extracted from eQTS GSEA leading edge.** Transcripts that appeared in 14 or more GSEA (on eQTS) leading edges for enriched GO terms (FDR<0.05).

eQTS, expression quantitative trait score; GSEA, gene set enrichment analysis; #, number of times that the gene appeared in the leading edge; Source data are provided as a Source Data file.

| Gene          | #  | Gene           | #  | Gene         | #  | Gene          | #  | Gene          | #  |
|---------------|----|----------------|----|--------------|----|---------------|----|---------------|----|
| <i>ANK2</i>   | 23 | <i>MYH7</i>    | 21 | <i>DMD</i>   | 18 | <i>NKX2-5</i> | 15 | <i>NDUFS6</i> | 14 |
| <i>RYR2</i>   | 23 | <i>CACNA1C</i> | 20 | <i>SCN5A</i> | 18 | <i>TNNT2</i>  | 15 | <i>NDUFV2</i> | 14 |
| <i>CAV3</i>   | 22 | <i>PKP2</i>    | 20 | <i>KCNJ2</i> | 17 | <i>CALM1</i>  | 14 | <i>TNNI3</i>  | 14 |
| <i>ATP1A2</i> | 21 | <i>TAZ</i>     | 20 | <i>PLN</i>   | 17 | <i>CALM3</i>  | 14 |               |    |
| <i>GJA5</i>   | 21 | <i>SLC8A1</i>  | 19 | <i>MYL2</i>  | 16 | <i>MYBPC3</i> | 14 |               |    |

**Table 11: Proteomics core gene candidates extracted from pQTS GSEA leading edge.**

Proteins that appeared in the leading edge of the significantly enriched pQTS gene set (FDR<0.05). pQTS, protein quantitative trait score; GSEA, gene set enrichment analysis; Source data are provided as a Source Data file.

| Gene    | Gene   | Gene   | Gene     | Gene    | Gene     | Gene     |
|---------|--------|--------|----------|---------|----------|----------|
| ABHD10  | APOC1  | COX5A  | GBAS     | MPST    | NME1     | PRELP    |
| ACAD10  | AQP1   | COX6C  | GCDH     | MSRA    | NT5C     | PRKAR2B  |
| ACADVL  | ATP1B1 | CRAT   | GLRX     | MTAP    | OGDH     | PTGES2   |
| ACAT1   | ATP5A1 | CS     | GLUD1    | MTHFD1  | OGN      | PTGR2    |
| ACO1    | ATP5D  | CYB5R3 | GOT1     | NAMPT   | OLA1     | QDPR     |
| ACO2    | ATP5F1 | CYC1   | GPD1L    | NDUFA10 | OXCT1    | SDHA     |
| ACSBG2  | ATP5J2 | CYGB   | GPI      | NDUFA3  | P4HB     | SDHB     |
| ADA     | BCAT2  | DBT    | GSS      | NDUFA5  | PAFAH1B1 | SDHD     |
| ADI1    | BDH1   | DCXR   | GSTO1    | NDUFA7  | PAM      | SLC25A11 |
| ADK     | BGN    | DDAH2  | HIBADH   | NDUFA9  | PCCA     | SLC25A12 |
| AHCY    | BRP44  | DLAT   | HPRT1    | NDUFB10 | PCCB     | STOML2   |
| AK4     | C3     | ECH1   | HSD17B10 | NDUFB11 | PCYOX1   | SUCLA2   |
| AKR1A1  | CA1    | ECHS1  | HSD17B4  | NDUFB2  | PDE5A    | SUCLG1   |
| AKR7A2  | CA3    | ECI2   | IDH2     | NDUFB3  | PDHA1    | TALDO1   |
| ALDH1A1 | CAT    | ENO1   | IDH3A    | NDUFB8  | PDXK     | TPI1     |
| ALDH1A2 | CBR1   | ENO3   | IVD      | NDUFB9  | PEPD     | UQCR10   |
| ALDH2   | CKM    | ERLIN2 | LHPP     | NDUFC2  | PGK1     | UQCRC2   |
| ALDH4A1 | COQ3   | ESD    | MCCC1    | NDUFS3  | PGM1     | UQCRFS1  |
| ALDH5A1 | COQ5   | ETFA   | MCCC2    | NDUFS4  | PGM2     | VCAN     |
| ALDH6A1 | COQ7   | ETFB   | MCEE     | NDUFS7  | PGM5     | WARS     |
| ALDH7A1 | COQ9   | FH     | ME2      | NDUFS8  | PPA1     |          |
| APOBEC2 | COX4I1 | FMOD   | ME3      | NDUFV1  | PRDX4    |          |

**Table 12: Disease annotations for putative core genes and functional targets in literature.**

Findings relating putative core genes and functional targets to cardiovascular phenotypes.

Additionally, as stated by Wang and colleagues[5], multiple genes were either identified by their integrative omics approach or mentioned in the OMIM[6] database.

AF, atrial fibrillation; DCM, Dilated cardiomyopathy; HCM, Hypertrophic cardiomyopathy; OMIM, online Mendelian inheritance in men;

\*Mutation known to affect cardiovascular phenotypes; \*\*Mutation known to affect arrhythmias;

<sup>+</sup>Differential expression or functional impairment for cardiovascular phenotypes; <sup>++</sup>Differential expression or functional impairment for arrhythmias;

| Gene                         | Finding                                                  | Clinical phenotypes                       | First Author           |
|------------------------------|----------------------------------------------------------|-------------------------------------------|------------------------|
| <i>TNNT2</i> <sup>*,++</sup> | TNNT2 mutations                                          | DCM                                       | Hershberger[7]         |
|                              | Lower TNNT2 protein expression (human atrial tissue)     | AF                                        | Doll[8]                |
| <i>NKX2-5</i> <sup>**</sup>  | NKX2-5 mutations including loss of function mutation     | Arrhythmia, AF                            | Jhaveri[9], Huang[10]  |
| <i>NDUFA9</i> <sup>++</sup>  | Impaired complex I function (human atrial tissue)        | AF, diabetes                              | Kanaan[11]             |
| <i>NDUFB3</i> <sup>+</sup>   | NDUFB3 deficiency                                        | Cardiomyopathy                            | El-Hattab[12]          |
| <i>MYL4</i> <sup>**,++</sup> | Mutation in MYL4                                         | Familial AF                               | Orr[13]                |
|                              | Lower MYL4 protein expression (human atrial tissue)      | AF                                        | Doll[8]                |
| <i>CKM</i> <sup>++</sup>     | Lower CKM protein expression (human atrial tissue)       | AF                                        | Tu[14], Doll[8]        |
|                              | Lower CKM protein expression (human myocardial tissue)   | HCM                                       | Coats[15]              |
|                              |                                                          |                                           | (Coats Suppl. Table 3) |
| <i>PGAM2</i> <sup>++</sup>   | Lower PGAM2 protein expression (human atrial tissue)     | AF                                        | Tu[14]                 |
|                              | Lower PGAM2 protein expression (human myocardial tissue) | HCM                                       | Coats[15]              |
|                              |                                                          |                                           | (Coats Suppl. Table 3) |
| <i>TNNC1</i> <sup>*</sup>    | Mutation in TNNC1                                        | Cardiomyopathy                            | Parvatiyar[16]         |
| <i>ETFB</i> <sup>**,++</sup> | Lower ETFB protein expression (human atrial tissue)      | AF                                        | Tu[14]                 |
|                              | ETFB mutation                                            | Arrhythmias, HCM, DCM, conduction defects | Florian[17]            |
| <i>ALDOA</i> <sup>++</sup>   | Lower ALDOA protein expression (human atrial tissue)     | AF                                        | Tu[14]                 |
|                              | Lower ALDOA protein expression (human myocardial tissue) | HCM                                       | Coats[15]              |
|                              |                                                          |                                           | (Coats Suppl. Table 3) |
| <i>TCAP</i> <sup>*</sup>     | TCAP gene mutations                                      | HCM, DCM                                  | Hayashi[18]            |
| <i>TOM1L2</i>                | Differentially expressed                                 | AF together with neurocognitive decline   | Dalal[19]              |

**Table 13: Putative core genes and functional targets differential expression in the GSE128188 dataset.**

RNA-seq differential expression results for AF in right and left atrial appendage tissue. Statistics were calculated using edgeR's exact test and are reported from the original authors of the study. FDR<sub>core</sub> denotes Benjamini-Hochberg false discovery rate applied only on the 20 putative core genes listed below.

Additionally, as stated by Wang and colleagues[5], multiple genes were either identified by their integrative omics approach or mentioned in the OMIM[6] database.

AF, atrial fibrillation; logFC, logarithm of the fold change; QTL, quantitative trait loci; FDR, false discovery rate;

\*Mutation known to affect cardiovascular phenotypes; \*\*Mutation known to affect arrhythmias;

<sup>+</sup>Differential expression or functional impairment for cardiovascular phenotypes; <sup>++</sup>Differential expression or functional impairment for arrhythmias;

| Gene                         | Type          | mRNA AF association<br>(right atrial appendage) |          |        |                     | mRNA AF association<br>(left atrial appendage) |         |       |                     |
|------------------------------|---------------|-------------------------------------------------|----------|--------|---------------------|------------------------------------------------|---------|-------|---------------------|
|                              |               | logFC                                           | P value  | FDR    | FDR <sub>core</sub> | logFC                                          | P value | FDR   | FDR <sub>core</sub> |
| <i>TNNT2</i> <sup>*,++</sup> | Trans-eQTL    | -0.117                                          | 0.382    | 1.00   | 0.616               | -0.191                                         | 0.152   | 0.983 | 0.522               |
| <i>NKX2-5</i> <sup>**</sup>  | Trans-eQTL    | -0.121                                          | 0.431    | 1.00   | 0.616               | -0.104                                         | 0.498   | 1.00  | 0.712               |
| <i>CYB5R3</i>                | Trans-pQTL    | -0.00112                                        | 0.993    | 1.00   | 0.993               | 0.0529                                         | 0.672   | 1.00  | 0.829               |
| <i>NDUFB3</i> <sup>+</sup>   | Trans-pQTL    | -0.293                                          | 0.0443   | 0.554  | 0.272               | -0.113                                         | 0.439   | 1.00  | 0.701               |
| <i>HIBADH</i>                | Trans-pQTL    | -0.236                                          | 0.0817   | 0.686  | 0.272               | -0.147                                         | 0.277   | 1.00  | 0.522               |
| <i>NDUFA9</i> <sup>++</sup>  | Trans-pQTL    | -0.138                                          | 0.285    | 0.971  | 0.571               | -0.0964                                        | 0.456   | 1.00  | 0.701               |
| <i>DLAT</i>                  | Trans-pQTL    | -0.0498                                         | 0.735    | 1.00   | 0.817               | -0.0373                                        | 0.800   | 1.00  | 0.889               |
| <i>PPIF</i>                  | NKX2-5 target | -0.0746                                         | 0.615    | 1.00   | 0.724               | 0.0145                                         | 0.922   | 1.00  | 0.922               |
| <i>MYL4</i> <sup>**,++</sup> | NKX2-5 target | -0.549                                          | 0.000681 | 0.0546 | 0.0136              | -0.412                                         | 0.0107  | 0.338 | 0.214               |
| <i>CKM</i> <sup>++</sup>     | NKX2-5 target | -0.208                                          | 0.239    | 0.941  | 0.571               | -0.194                                         | 0.271   | 1.00  | 0.522               |
| <i>MYL7</i>                  | NKX2-5 target | -0.352                                          | 0.0731   | 0.658  | 0.272               | -0.271                                         | 0.167   | 1.00  | 0.522               |
| <i>PGAM2</i> <sup>++</sup>   | NKX2-5 target | -0.521                                          | 0.00292  | 0.129  | 0.0292              | -0.367                                         | 0.0359  | 0.596 | 0.359               |
| <i>TNNC1</i> <sup>*</sup>    | NKX2-5 target | -0.0311                                         | 0.833    | 1.00   | 0.877               | 0.167                                          | 0.259   | 1.00  | 0.522               |
| <i>CYC1</i>                  | NKX2-5 target | -0.237                                          | 0.11     | 0.77   | 0.315               | -0.158                                         | 0.287   | 1.00  | 0.522               |
| <i>ETFB</i> <sup>**,++</sup> | NKX2-5 target | -0.0999                                         | 0.460    | 1.00   | 0.616               | -0.0513                                        | 0.704   | 1.00  | 0.829               |
| <i>PRDX5</i>                 | NKX2-5 target | -0.226                                          | 0.074    | 0.660  | 0.272               | -0.230                                         | 0.0688  | 0.764 | 0.459               |
| <i>AK1</i>                   | NKX2-5 target | -0.136                                          | 0.357    | 0.998  | 0.616               | -0.180                                         | 0.225   | 1.00  | 0.522               |
| <i>ALDOA</i> <sup>++</sup>   | NKX2-5 target | -0.0992                                         | 0.492    | 1.00   | 0.616               | -0.0568                                        | 0.694   | 1.00  | 0.829               |
| <i>TCAP</i> <sup>*</sup>     | NKX2-5 target | -0.164                                          | 0.277    | 0.967  | 0.571               | -0.170                                         | 0.259   | 1.00  | 0.522               |
| <i>TOM1L2</i>                | NKX2-5 target | -0.098                                          | 0.493    | 1.00   | 0.616               | 0.0205                                         | 0.886   | 1.00  | 0.922               |

**Table 14: Putative core genes and functional targets AF disease association for the proteomics dataset PXD006675.**

Proteomics differential abundance results in human left atrial appendage tissue for AF. Two-sided *T* tests were calculated and are reported from the original authors of the study.

AF, atrial fibrillation; QTL, quantitative trait loci; FDR, false discovery rate;

\*Mutation known to affect cardiovascular phenotypes; \*\*Mutation known to affect arrhythmias;

+Differential expression or functional impairment for cardiovascular phenotypes; ++Differential expression or functional impairment for arrhythmias;

| Gene                  | Type               | Protein AF association |                |             |        |
|-----------------------|--------------------|------------------------|----------------|-------------|--------|
|                       |                    | Difference             | <i>P</i> value | Significant | FDR    |
| TNNT2 <sup>*,++</sup> | <i>Trans</i> -eQTL | -1.300                 | 0.000973       | yes         | 0.0185 |
| NKX2-5 <sup>**</sup>  | <i>Trans</i> -eQTL |                        |                |             |        |
| CYB5R3                | <i>Trans</i> -pQTL | 0.260                  | 0.113          |             | 0.195  |
| NDUFB3 <sup>+</sup>   | <i>Trans</i> -pQTL | -0.195                 | 0.611          |             | 0.726  |
| HIBADH                | <i>Trans</i> -pQTL | -0.197                 | 0.504          |             | 0.638  |
| NDUFA9 <sup>++</sup>  | <i>Trans</i> -pQTL | -0.075                 | 0.727          |             | 0.727  |
| DLAT                  | <i>Trans</i> -pQTL | -0.409                 | 0.0284         |             | 0.0674 |
| PPIF                  | NKX2-5 target      | -0.124                 | 0.711          |             | 0.727  |
| MYL4 <sup>**,++</sup> | NKX2-5 target      | -1.480                 | 0.00594        | yes         | 0.0376 |
| CKM <sup>++</sup>     | NKX2-5 target      | -0.955                 | 0.00499        | yes         | 0.0376 |
| MYL7                  | NKX2-5 target      | -0.771                 | 0.0188         |             | 0.0562 |
| PGAM2 <sup>++</sup>   | NKX2-5 target      | -0.776                 | 0.0207         |             | 0.0562 |
| TNNC1 <sup>*</sup>    | NKX2-5 target      | 0.293                  | 0.692          |             | 0.727  |
| CYC1                  | NKX2-5 target      | -0.723                 | 0.0187         |             | 0.0562 |
| ETFB <sup>**,++</sup> | NKX2-5 target      | 0.562                  | 0.127          |             | 0.201  |
| PRDX5                 | NKX2-5 target      | -0.647                 | 0.0142         |             | 0.0562 |
| AK1                   | NKX2-5 target      | -0.609                 | 0.0561         |             | 0.107  |
| ALDOA <sup>++</sup>   | NKX2-5 target      | -0.644                 | 0.0391         |             | 0.0825 |
| TCAP <sup>*</sup>     | NKX2-5 target      | 0.531                  | 0.360          |             | 0.489  |
| TOM1L2                | NKX2-5 target      | 0.288                  | 0.183          |             | 0.268  |

**Table 15: Partial correlation analysis of *NKX2-5* expression linking the SNP rs9481842 and TF activity.**

Two-sided Pearson's correlation tests unless stated otherwise.

TF, transcription factor; \*one-sided Pearson's correlation test;

| Measure             | SNP and <i>NKX2-5</i> mRNA         | SNP and TF activity   | <i>NKX2-5</i> mRNA and TF activity |
|---------------------|------------------------------------|-----------------------|------------------------------------|
| Correlation         | -0.43 ( $P = 1.4 \times 10^{-4}$ ) | -0.13 ( $P = 0.13$ )* | 0.36 ( $P = 1.3 \times 10^{-4}$ )* |
| Partial correlation | -0.41 ( $P = 3 \times 10^{-4}$ )   | 0.007 ( $P = 0.95$ )  | 0.3 ( $P = 0.011$ )                |
| Condition           | TF activity                        | <i>NKX2-5</i> mRNA    | SNP                                |

**Table 16: NKX2-5 target correlations with *trans*-eQTL SNP rs9481842 and NKX2-5 transcript as well as AF disease association.**

All associations were computed by two-sided *T* tests based on a linear model with covariates (fibroblast-score, RIN-score or protein concentration). Correlation of SNP rs9481842 with target transcript (*trans*-eQTL) and target protein (*trans*-pQTL) were evaluated as well as the correlation between NKX2-5 transcript expression and target protein expression. FDR based on the Benjamini-Hochberg procedure was only assessed for a preselected subset of genes when evaluating the correlation between the TF and target protein expression (see methods and Supplementary Fig. 13). Proteomics differential expression results are the same as reported in Table 4, were derived by two-sided *T* tests and additionally included common risk factors for AF as covariates (age, sex, BMI, diabetes, systolic blood pressure, hypertension medication, myocardial infarction and smoking) in the linear model.

SNP, single-nucleotide polymorphism; BS, number of binding sites; AF, atrial fibrillation; eQTL, expression quantitative trait loci; pQTL, protein quantitative trait loci; FDR, false discovery rate; \*Mutation known to affect cardiovascular phenotypes; \*\*Mutation known to affect arrhythmias; <sup>+</sup>Differential expression or functional impairment for cardiovascular phenotypes; <sup>++</sup>Differential expression or functional impairment for arrhythmias; Source data are provided as a Source Data file.

| NKX2-5 target                |    | SNP rs9481842              |                                   |                            |                                   | NKX2-5 target protein association |                       |         | Disease association protein and AF |                |
|------------------------------|----|----------------------------|-----------------------------------|----------------------------|-----------------------------------|-----------------------------------|-----------------------|---------|------------------------------------|----------------|
| Gene                         | BS | <i>Trans</i> -eQTL $\beta$ | <i>Trans</i> -eQTL <i>P</i> value | <i>Trans</i> -pQTL $\beta$ | <i>Trans</i> -pQTL <i>P</i> value | $\beta$                           | <i>P</i> value        | FDR     | $\beta$                            | <i>P</i> value |
| <i>PPIF</i>                  | 1  | -0.131                     | 0.0081                            | -0.0388                    | 0.0145                            | 0.172                             | $2.10 \times 10^{-4}$ | 0.00824 | -0.0342                            | 0.261          |
| <i>MYL4</i> ** <sup>++</sup> | 1  | -0.087                     | 0.00921                           | -0.0359                    | 0.0820                            | 0.211                             | $3.98 \times 10^{-4}$ | 0.00824 | -0.0270                            | 0.509          |
| <i>CKM</i> <sup>++</sup>     | 2  | -0.115                     | 0.0101                            | -0.0188                    | 0.303                             | 0.180                             | $4.56 \times 10^{-4}$ | 0.00824 | -0.0875                            | 0.00705        |
| <i>MYL7</i>                  | 5  | -0.125                     | 0.0038                            | -0.0298                    | 0.177                             | 0.208                             | $4.74 \times 10^{-4}$ | 0.00824 | -0.0421                            | 0.304          |
| <i>PGAM2</i> <sup>++</sup>   | 2  | -0.214                     | 0.00307                           | -0.0293                    | 0.284                             | 0.255                             | $7.35 \times 10^{-4}$ | 0.0107  | -0.175                             | 0.000452       |
| <i>TNNC1</i> *               | 7  | -0.0699                    | 0.0359                            | -0.00809                   | 0.623                             | 0.147                             | $1.69 \times 10^{-3}$ | 0.0211  | -0.0557                            | 0.0929         |
| <i>CYC1</i>                  | 3  | -0.121                     | 0.00278                           | -0.00651                   | 0.749                             | 0.175                             | $3.16 \times 10^{-3}$ | 0.0307  | -0.0946                            | 0.0360         |
| <i>ETFB</i> ** <sup>++</sup> | 2  | -0.0924                    | 0.0110                            | -0.0336                    | 0.0563                            | 0.152                             | $3.39 \times 10^{-3}$ | 0.0307  | -0.0553                            | 0.105          |
| <i>PRDX5</i>                 | 6  | -0.0710                    | 0.00641                           | -0.0149                    | 0.307                             | 0.131                             | $3.52 \times 10^{-3}$ | 0.0307  | -0.0524                            | 0.0789         |
| <i>AK1</i>                   | 3  | -0.0654                    | 0.0268                            | -0.0224                    | 0.190                             | 0.138                             | $4.17 \times 10^{-3}$ | 0.0312  | -0.0669                            | 0.0341         |
| <i>ALDOA</i> <sup>++</sup>   | 7  | -0.0555                    | 0.0469                            | -0.00187                   | 0.909                             | 0.125                             | $5.50 \times 10^{-3}$ | 0.0368  | -0.0646                            | 0.0341         |
| <i>TCAP</i> *                | 5  | -0.114                     | 0.00707                           | -0.0365                    | 0.266                             | 0.244                             | $6.90 \times 10^{-3}$ | 0.0429  | -0.0178                            | 0.779          |
| <i>TOM1L2</i>                | 2  | -0.0886                    | 0.0157                            | -0.0292                    | 0.222                             | 0.170                             | $8.16 \times 10^{-3}$ | 0.0473  | -0.0771                            | 0.0849         |

**Table 17: *Trans*-QTL results.**

Significant *trans*-eQTLs and pQTLs at a FDR<0.2 (Benjamini-Hochberg procedure to account for multiple comparisons per omic). Two sided *T* tests were performed for 108 SNPs annotated with atrial fibrillation with 23 transcripts (*N*=74) and 152 proteins (*N*=73).

QTL, quantitative trait loci; eQTL, expression quantitative trait loci; pQTL, protein quantitative trait loci; FDR, false discovery rate;

\*Mutation known to affect cardiovascular phenotypes; \*\*Mutation known to affect arrhythmias; <sup>+</sup>Differential expression or functional impairment for cardiovascular phenotypes; <sup>++</sup>Differential expression or functional impairment for arrhythmias; Source data are provided as a Source Data file.

| Variant    |       |             | Gene                         |       | <i>Trans</i> -eQTL |                |                       |               | <i>Trans</i> -pQTL |                |                       |              |
|------------|-------|-------------|------------------------------|-------|--------------------|----------------|-----------------------|---------------|--------------------|----------------|-----------------------|--------------|
| SNP        | Chr   | Position    | Transcript                   | Chr   | $\beta$            | <i>T</i> value | <i>P</i> value        | FDR           | $\beta$            | <i>T</i> value | <i>P</i> value        | FDR          |
| rs1158168  | chr17 | 7,406,134   | <i>TNNI2</i> * <sup>++</sup> | chr1  | -0.517             | -4.27          | $6.43 \times 10^{-5}$ | <b>0.0812</b> | -0.213             | -1.42          | 0.160                 | 0.928        |
| rs9481842  | chr6  | 118,974,798 | <i>NKX2-5</i> **             | chr5  | -0.593             | -4.27          | $6.54 \times 10^{-5}$ | <b>0.0812</b> |                    |                |                       |              |
| Variant    |       |             | Gene                         |       | <i>Trans</i> -eQTL |                |                       |               | <i>Trans</i> -pQTL |                |                       |              |
| SNP        | Chr   | Position    | Protein                      | Chr   | $\beta$            | <i>T</i> value | <i>P</i> value        | FDR           | $\beta$            | <i>T</i> value | <i>P</i> value        | FDR          |
| rs11588763 | chr1  | 154,813,584 | CYB5R3                       | chr22 | -0.119             | -0.527         | 0.600                 | 0.998         | -0.786             | -4.89          | $6.86 \times 10^{-6}$ | <b>0.113</b> |
| rs11588763 | chr1  | 154,813,584 | NDUFB3 <sup>+</sup>          | chr2  | 0.291              | 1.31           | 0.193                 | 0.973         | -0.916             | -4.44          | $3.56 \times 10^{-5}$ | <b>0.133</b> |
| rs11658168 | chr17 | 7,406,134   | HIBADH                       | chr7  | -0.144             | -0.861         | 0.393                 | 0.997         | -0.512             | -4.43          | $3.66 \times 10^{-5}$ | <b>0.133</b> |
| rs11588763 | chr1  | 154,813,584 | NDUFA9 <sup>++</sup>         | chr12 | 0.257              | 1.16           | 0.249                 | 0.985         | -0.752             | -4.42          | $3.85 \times 10^{-5}$ | <b>0.133</b> |
| rs11588763 | chr1  | 154,813,584 | DLAT                         | chr11 | 0.470              | 2.56           | 0.0126                | 0.759         | -0.716             | -4.40          | $4.05 \times 10^{-5}$ | <b>0.133</b> |



**Table 18: AFHRI cohort baseline table.**

AF, atrial fibrillation; PRS, genome-wide polygenic score; BMI, body mass index; BP, blood pressure; conc., concentration;

| Variable                                               | All samples         | eQTL/eQTS           | pQTL/pQTS           | AF association      | All omics           |
|--------------------------------------------------------|---------------------|---------------------|---------------------|---------------------|---------------------|
| Samples measured, n (%)                                | 118 (100)           | 75 (64)             | 74 (63)             | 78 (66)             | 66 (56)             |
| Women, n (%)                                           | 13 (11)             | 5 (7)               | 4 (5)               | 4 (5)               | 3 (5)               |
| prevalent AF, n (%)                                    | 15 (13)             | 13 (17)             | 9 (12)              | 10 (13)             | 9 (14)              |
| AF PRS, median (IQR)                                   | 32.40 (32.33-32.48) | 32.40 (32.33-32.48) | 32.40 (32.33-32.49) | 32.39 (32.32-32.48) | 32.39 (32.33-32.48) |
| Age, median (IQR), y                                   | 66.8 (59.5-73.5)    | 68.4 (60.6-73.8)    | 67.2 (59.7-73.7)    | 66.1 (58.6-72.0)    | 67.7 (60.6-73.7)    |
| BMI, median (IQR), kg/m <sup>2</sup>                   | 27.8 (24.8-30.4)    | 28.3 (25.0-30.5)    | 27.6 (24.8-30.5)    | 26.9 (24.4-30.5)    | 28.0 (25.0-30.5)    |
| systolic BP, median (IQR), mmHg                        | 135 (122-145)       | 137 (123-146)       | 136 (122-145)       | 134 (122-145)       | 136 (123-145)       |
| diastolic BP, median (IQR), mmHg                       | 76 (70-82)          | 76 (70-81)          | 76 (70-80)          | 76 (70-80)          | 76 (70-80)          |
| Hypertension, n (%)                                    | 105 (89)            | 68 (91)             | 66 (89)             | 68 (87)             | 60 (91)             |
| Hypertension medication, n (%)                         | 98 (83)             | 64 (85)             | 61 (82)             | 64 (82)             | 56 (85)             |
| Diabetes, n (%)                                        | 36 (31)             | 25 (33)             | 23 (31)             | 25 (32)             | 22 (33)             |
| Diabetes medication, n (%)                             | 33 (28)             | 24 (32)             | 22 (30)             | 22 (28)             | 21 (32)             |
| Myocardial infarction, n (%)                           | 45 (38)             | 29 (39)             | 30 (41)             | 29 (37)             | 27 (41)             |
| Smoking, n (%)                                         | 28 (24)             | 14 (19)             | 15 (20)             | 20 (26)             | 13 (20)             |
| fibroblast-score, median (IQR)                         | 80.43 (79.52-81.87) | 80.42 (79.12-82.81) | 80.26 (79.08-81.87) | 80.34 (79.19-81.68) | 80.26 (79.08-82.06) |
| RIN-score, median (IQR)                                | 7.7 (7.1-8.1)       | 7.6 (7.1-8.1)       | 7.6 (7.1-8.1)       | 7.7 (7.3-8.1)       | 7.6 (7.1-8.1)       |
| Protein conc., median (IQR), $\mu\text{g}/\mu\text{l}$ | 0.87 (0.45-1.31)    | 0.80 (0.45-1.30)    | 0.80 (0.45-1.32)    | 0.63 (0.43-1.32)    | 0.80 (0.45-1.30)    |

**Table 19: ENCODE resources used to annotate RNA-binding proteins (RBP) binding sites.**

eCLIP data for all RBPs for Hep2 and K562 cell lines provided by Gene Yeo, UCSD.

[https://www.encodeproject.org/report/?type=Experiment&status=released&replicates.library.biosample.donor.organism.scientific\\_name=Homo+sapiens&biosample\\_ontology.classification=cell+line&assay\\_title=eCLIP&limit=all](https://www.encodeproject.org/report/?type=Experiment&status=released&replicates.library.biosample.donor.organism.scientific_name=Homo+sapiens&biosample_ontology.classification=cell+line&assay_title=eCLIP&limit=all)

| Accession   | Assay | Target gene   | Cell line | Accession    | Assay | Target gene | Cell line | Accession   | Assay | Target gene   | Cell line |
|-------------|-------|---------------|-----------|--------------|-------|-------------|-----------|-------------|-------|---------------|-----------|
| ENCSR999YGP | eCLIP | GRWD1         | K562      | ENCSR648LAH  | eCLIP | DDX3X       | HepG2     | ENCSR001KKZ | eCLIP | PHF6          | K562      |
| ENCSR249ROI | eCLIP | HNRNPC        | K562      | ENCSR384MWVO | eCLIP | CSTF2       | HepG2     | ENCSR721HPX | eCLIP | G3BP1         | HepG2     |
| ENCSR820UYE | eCLIP | PABPN1        | HepG2     | ENCSR154CSN  | eCLIP | DDX52       | K562      | ENCSR464OSH | eCLIP | FUS           | HepG2     |
| ENCSR365NVO | eCLIP | TRA2A         | K562      | ENCSR331VNX  | eCLIP | FMR1        | K562      | ENCSR906ZJF | eCLIP | SDAD1         | K562      |
| ENCSR337XGI | eCLIP | SAFB          | HepG2     | ENCSR987NYS  | eCLIP | FAM120A     | HepG2     | ENCSR754NDA | eCLIP | RBM15         | HepG2     |
| ENCSR977OXX | eCLIP | PRPF4         | HepG2     | ENCSR861GYE  | eCLIP | LIN28B      | HepG2     | ENCSR181NRW | eCLIP | ZC3H8         | K562      |
| ENCSR862QCH | eCLIP | U2AF1L5,U2AF1 | K562      | ENCSR970FEW  | eCLIP | DDX52       | HepG2     | ENCSR322HHA | eCLIP | TIAL1         | HepG2     |
| ENCSR240MVJ | eCLIP | HNRNPU        | HepG2     | ENCSR973HOJ  | eCLIP | FXR2        | HepG2     | ENCSR867ZVK | eCLIP | YWHAG         | K562      |
| ENCSR529FKI | eCLIP | YBX3          | K562      | ENCSR352STY  | eCLIP | SSB         | HepG2     | ENCSR584TCR | eCLIP | TARDBP        | K562      |
| ENCSR841EQA | eCLIP | TAF15         | HepG2     | ENCSR050BDZ  | eCLIP | SDAD1       | HepG2     | ENCSR999WKT | eCLIP | DDX24         | K562      |
| ENCSR022BVV | eCLIP | LSM11         | K562      | ENCSR685AUR  | eCLIP | ZNF800      | HepG2     | ENCSR456KXI | eCLIP | LARP7         | K562      |
| ENCSR267OLV | eCLIP | SF3B4         | K562      | ENCSR089BXO  | eCLIP | ABCF1       | K562      | ENCSR840DRD | eCLIP | CSTF2T        | K562      |
| ENCSR828ZID | eCLIP | HNRNPK        | HepG2     | ENCSR145NLR  | eCLIP | DDX51       | K562      | ENCSR653HQC | eCLIP | DROSHA        | K562      |
| ENCSR406OOZ | eCLIP | SUB1          | HepG2     | ENCSR989VIY  | eCLIP | SRSF1       | HepG2     | ENCSR331MIC | eCLIP | SF3A3         | HepG2     |
| ENCSR062NNB | eCLIP | IGF2BP2       | K562      | ENCSR194HZU  | eCLIP | NOLC1       | HepG2     | ENCSR993OLA | eCLIP | IGF2BP3       | HepG2     |
| ENCSR267UCX | eCLIP | HNRNPM        | HepG2     | ENCSR979EWD  | eCLIP | STAU2       | HepG2     | ENCSR006OEQ | eCLIP | FAM120A       | K562      |
| ENCSR196INN | eCLIP | RBM15         | K562      | ENCSR586DGV  | eCLIP | ZNF800      | K562      | ENCSR755TJC | eCLIP | HNRNPUL1      | HepG2     |
| ENCSR571ROL | eCLIP | XRCC6         | HepG2     | ENCSR485QCG  | eCLIP | BCCIP       | HepG2     | ENCSR773KRC | eCLIP | SRSF9         | HepG2     |
| ENCSR366YOG | eCLIP | QKI           | K562      | ENCSR279UJF  | eCLIP | SF3B4       | HepG2     | ENCSR724RDN | eCLIP | HNRNPL        | HepG2     |
| ENCSR412NOW | eCLIP | HNRNPM        | K562      | ENCSR589YHM  | eCLIP | HLTF        | K562      | ENCSR916SRV | eCLIP | TBRG4         | HepG2     |
| ENCSR135VMS | eCLIP | LSM11         | HepG2     | ENCSR893NWB  | eCLIP | GRWD1       | HepG2     | ENCSR744GEU | eCLIP | IGF2BP1       | HepG2     |
| ENCSR661ICQ | eCLIP | PUM2          | K562      | ENCSR795CAI  | eCLIP | HNRNPL      | K562      | ENCSR550DVK | eCLIP | HNRNPC        | HepG2     |
| ENCSR893EFU | eCLIP | DDX6          | K562      | ENCSR200DKE  | eCLIP | MTPAP       | K562      | ENCSR543TPH | eCLIP | AGGF1         | HepG2     |
| ENCSR059CVF | eCLIP | SBDS          | K562      | ENCSR8055RN  | eCLIP | LARP4       | HepG2     | ENCSR887FHF | eCLIP | FASTKD2       | K562      |
| ENCSR947JVR | eCLIP | DGCR8         | K562      | ENCSR845VGB  | eCLIP | DDX55       | HepG2     | ENCSR819XBT | eCLIP | AATF          | K562      |
| ENCSR356ZMO | eCLIP | AKAP1         | HepG2     | ENCSR023UHL  | eCLIP | FASTKD2     | HepG2     | ENCSR506UPY | eCLIP | SUGP2         | HepG2     |
| ENCSR922WJV | eCLIP | PCBP1         | K562      | ENCSR265ZIS  | eCLIP | GTF2F1      | HepG2     | ENCSR489ABS | eCLIP | RBM5          | HepG2     |
| ENCSR975KIR | eCLIP | IGF2BP1       | K562      | ENCSR486YGP  | eCLIP | FUBP3       | HepG2     | ENCSR351PVI | eCLIP | SLTM          | HepG2     |
| ENCSR177QQY | eCLIP | AKAP1         | K562      | ENCSR290VLT  | eCLIP | MATR3       | HepG2     | ENCSR887LPK | eCLIP | EWSR1         | K562      |
| ENCSR766FAC | eCLIP | RPS3          | HepG2     | ENCSR993FMY  | eCLIP | TROVE2      | HepG2     | ENCSR820DQJ | eCLIP | NOL12         | HepG2     |
| ENCSR539BEV | eCLIP | UPF1          | HepG2     | ENCSR295OKT  | eCLIP | RBM22       | K562      | ENCSR981WKN | eCLIP | PTBP1         | K562      |
| ENCSR046JHH | eCLIP | CPEB4         | K562      | ENCSR769UEW  | eCLIP | HNRNPA1     | HepG2     | ENCSR532VUB | eCLIP | CPSF6         | K562      |
| ENCSR023PKW | eCLIP | EIF3G         | K562      | ENCSR154HRN  | eCLIP | HNRNPA1     | K562      | ENCSR061SZV | eCLIP | DGCR8         | HepG2     |
| ENCSR121GQH | eCLIP | SERBP1        | K562      | ENCSR830BSQ  | eCLIP | BUD13       | HepG2     | ENCSR384KAN | eCLIP | PTBP1         | HepG2     |
| ENCSR366DGX | eCLIP | KHSRP         | HepG2     | ENCSR456JQJ  | eCLIP | RBM22       | HepG2     | ENCSR958FKZ | eCLIP | PABPC4        | K562      |
| ENCSR141OIM | eCLIP | DDX6          | HepG2     | ENCSR238CLX  | eCLIP | GEMIN5      | K562      | ENCSR739VVT | eCLIP | ABOEC3C       | K562      |
| ENCSR520BZQ | eCLIP | HNRNPU        | K562      | ENCSR438KWZ  | eCLIP | ILF3        | K562      | ENCSR038JME | eCLIP | WRN           | K562      |
| ENCSR432XUP | eCLIP | SRSF1         | K562      | ENCSR488JKY  | eCLIP | UTP18       | HepG2     | ENCSR921SXC | eCLIP | XP05          | HepG2     |
| ENCSR534YOI | eCLIP | PRPF8         | K562      | ENCSR018WPY  | eCLIP | AQR         | HepG2     | ENCSR085JPB | eCLIP | WDR43         | HepG2     |
| ENCSR529GSJ | eCLIP | DHX30         | K562      | ENCSR964VOX  | eCLIP | UTP18       | K562      | ENCSR734ZHL | eCLIP | UTP3          | K562      |
| ENCSR373ODC | eCLIP | SMNDC1        | HepG2     | ENCSR655NZA  | eCLIP | XRN2        | HepG2     | ENCSR815VVI | eCLIP | CDC40         | HepG2     |
| ENCSR867DSZ | eCLIP | NPM1          | K562      | ENCSR725ARB  | eCLIP | AGGF1       | K562      | ENCSR061EVO | eCLIP | SND1          | HepG2     |
| ENCSR834YLD | eCLIP | DROSHA        | HepG2     | ENCSR668MJX  | eCLIP | GRSF1       | HepG2     | ENCSR121NVA | eCLIP | PRPF8         | HepG2     |
| ENCSR268ETU | eCLIP | HNRNPK        | K562      | ENCSR570WLM  | eCLIP | QKI         | HepG2     | ENCSR844RVX | eCLIP | EFTUD2        | K562      |
| ENCSR081JYH | eCLIP | NSUN2         | K562      | ENCSR018ZUE  | eCLIP | FKBP4       | HepG2     | ENCSR506OTC | eCLIP | TBRG4         | K562      |
| ENCSR339FUY | eCLIP | PCBP2         | HepG2     | ENCSR269AJF  | eCLIP | RPS11       | K562      | ENCSR197INS | eCLIP | PPIL4         | K562      |
| ENCSR923NNK | eCLIP | DDX55         | K562      | ENCSR440SUX  | eCLIP | MATR3       | K562      | ENCSR861PAR | eCLIP | NONO          | K562      |
| ENCSR970NKP | eCLIP | LIN28B        | K562      | ENCSR903PRV  | eCLIP | FTO         | HepG2     | ENCSR987FTF | eCLIP | RBFOX2        | HepG2     |
| ENCSR301UQM | eCLIP | GNL3          | K562      | ENCSR256CHX  | eCLIP | PCBP1       | HepG2     | ENCSR224QWC | eCLIP | FXR2          | K562      |
| ENCSR484LTQ | eCLIP | NCBP2         | K562      | ENCSR961OKA  | eCLIP | LARP7       | HepG2     | ENCSR663WES | eCLIP | BUD13         | K562      |
| ENCSR888YTT | eCLIP | LARP4         | K562      | ENCSR565DGW  | eCLIP | DHX30       | HepG2     | ENCSR303OQD | eCLIP | METAP2        | K562      |
| ENCSR018RVZ | eCLIP | NCBP2         | HepG2     | ENCSR120EAR  | eCLIP | RPS3        | K562      | ENCSR206RXT | eCLIP | AKAP8L        | K562      |
| ENCSR097NEE | eCLIP | PIPG          | HepG2     | ENCSR663NRA  | eCLIP | ZRANB2      | K562      | ENCSR893RAV | eCLIP | U2AF2         | K562      |
| ENCSR930BLL | eCLIP | DDX3X         | K562      | ENCSR786TSC  | eCLIP | ILF3        | HepG2     | ENCSR041NUV | eCLIP | EIF3D         | HepG2     |
| ENCSR965DLL | eCLIP | SFPQ          | HepG2     | ENCSR001VAC  | eCLIP | NOLC1       | K562      | ENCSR657TZB | eCLIP | XRN2          | K562      |
| ENCSR277DEO | eCLIP | NKRF          | HepG2     | ENCSR308YNT  | eCLIP | PUM1        | K562      | ENCSR916XIV | eCLIP | EIF3H         | HepG2     |
| ENCSR202BFN | eCLIP | U2AF2         | HepG2     | ENCSR128VHC  | eCLIP | SND1        | K562      | ENCSR736AAG | eCLIP | GTF2F1        | K562      |
| ENCSR202HKN | eCLIP | WDR3          | K562      | ENCSR647HXX  | eCLIP | HLTF        | HepG2     | ENCSR647CLF | eCLIP | GRKOW         | K562      |
| ENCSR774RFN | eCLIP | FXR1          | K562      | ENCSR606BPV  | eCLIP | AQR         | K562      | ENCSR301TFY | eCLIP | DKC1          | HepG2     |
| ENCSR658QIB | eCLIP | SMNDC1        | K562      | ENCSR876EYA  | eCLIP | BCLAF1      | HepG2     | ENCSR214BZA | eCLIP | DDX59         | HepG2     |
| ENCSR349CMI | eCLIP | WDR43         | K562      | ENCSR438GZQ  | eCLIP | KHSRP       | K562      | ENCSR820WHR | eCLIP | POLR2G        | HepG2     |
| ENCSR040QLV | eCLIP | DDX21         | K562      | ENCSR756CKJ  | eCLIP | RBFOX2      | K562      | ENCSR490IEE | eCLIP | UCHL5         | HepG2     |
| ENCSR891RIC | eCLIP | NIPBL         | K562      | ENCSR693JWP  | eCLIP | EXOSC5      | HepG2     | ENCSR291XPT | eCLIP | PUS1          | K562      |
| ENCSR356MSW | eCLIP | SSB           | K562      | ENCSR307YIV  | eCLIP | EIF4G2      | K562      | ENCSR943MHU | eCLIP | SAFB2         | K562      |
| ENCSR735HOK | eCLIP | YBX3          | HepG2     | ENCSR349KMG  | eCLIP | UCHL5       | K562      | ENCSR314UMJ | eCLIP | TRA2A         | HepG2     |
| ENCSR571VHI | eCLIP | HNRNPUL1      | K562      | ENCSR712IAG  | eCLIP | ZC3H11A     | K562      | ENCSR328LLU | eCLIP | U2AF1L5,U2AF1 | HepG2     |
| ENCSR580MFX | eCLIP | SUPV3L1       | HepG2     | ENCSR361OCV  | eCLIP | NIP7        | HepG2     | ENCSR989SMC | eCLIP | FTO           | K562      |
| ENCSR527DXF | eCLIP | EFTUD2        | HepG2     | ENCSR623VEH  | eCLIP | TIA1        | HepG2     | ENCSR907GUB | eCLIP | ZC3H11A       | HepG2     |
| ENCSR468FSW | eCLIP | SRSF7         | K562      | ENCSR069EVH  | eCLIP | FUS         | K562      | ENCSR628IDK | eCLIP | KHDRBS1       | K562      |
| ENCSR483NOP | eCLIP | SLBP          | K562      | ENCSR057DWB  | eCLIP | TIA1        | K562      | ENCSR539ZTS | eCLIP | TROVE2        | K562      |
| ENCSR000SSH | eCLIP | SLTM          | K562      | ENCSR580OFI  | eCLIP | SUPV3L1     | K562      | ENCSR133QEA | eCLIP | SF3B1         | K562      |
| ENCSR919HSE | eCLIP | CSTF2T        | HepG2     | ENCSR657TZZ  | eCLIP | ZNF622      | K562      | ENCSR013CTQ | eCLIP | EXOSC5        | K562      |
| ENCSR576SHT | eCLIP | DDX42         | K562      | ENCSR568DZW  | eCLIP | TAF15       | K562      | ENCSR456ASB | eCLIP | UPF1          | K562      |
| ENCSR513NDD | eCLIP | SRSF7         | HepG2     | ENCSR258QKO  | eCLIP | XRCC6       | K562      |             |       |               |           |
| ENCSR825SVO | eCLIP | AARS          | K562      | ENCSR484LAB  | eCLIP | SAFB        | K562      |             |       |               |           |

## Supplementary Information

### Supplementary Note 1

#### *Cis*-QTL replication

We compared QTLs across omics for our AFHRI cohort, across studies to the GTEx[1] atrial appendage tissue and across tissues to plasma *cis*-pQTLs. QTLs replicated well across omics and studies to the GTEx data, however significance levels varied strongly when compared to plasma pQTL data.

We systematically compared our AFHRI eQTLs to eQTLs for right atrial appendage tissue of the GTEx project. For the comparison, we first filtered the GTEx data for our measured SNPs and genes. We selected the most significant marker for each gene with *cis*-eQTL in our study ( $P < 1 \times 10^{-5}$ ) and compared allelic effects. Of all genes available for replication (54%), 62% replicated, 87% showed concordant effects (25% showed concordant effects without significance), and none of the eQTLs significant in both datasets showed discordant effects. Using Storey's q-value method[20], we estimated a replication rate of 85%.

Conversely, of the top GTEx SNPs analyzed in our study, 85% showed concordant allelic effects and 7.8% replicated. The low replication rate is probably due to the large difference in sample size, indicated by the high rate of concordant allelic effects.

#### Correlation between mRNA and protein

Protein and transcript levels showed a median correlation of 0.15 per gene and 0.21 per sample. Fitting a linear model to explain protein abundance from transcript expression showed a median  $R^2$  of 0.027 per gene and 0.044 per sample ( $N=79$ ). This general modest mRNA-protein correlation was observed by other comparable datasets as well (Supplementary Table 1)[2]. Correlations did not increase much if considering only genes with a *cis*-eQTL, however, highly variable genes showed a median correlation of 0.23.

To evaluate the variability of a gene, we compared the logarithm of the variance per gene (over all samples)  $\sigma_G$  to the median expression  $m_G$  and fit the linear model  $\log(\sigma_G) \sim \beta_0 + \beta_1 \cdot m_G + \varepsilon$ . Highly variable genes were then defined as all genes  $i$  with  $\sigma_{G_i} > \exp(\hat{\beta}_0 + \hat{\beta}_1 \cdot m_G + 3 \cdot \hat{\sigma}(\hat{\beta}_1))$ .

#### Overlap of *cis*-eQTLs and pQTLs:

We used Storey's qvalue method[20] to estimate replication rates between the top significant *cis*-QTLs in transcriptomics and proteomics. For a FDR < 0.05 significance cutoff, 32% of the top eQTLs replicated in pQTLs and 50% of the top pQTLs in eQTLs. We observe a Pearson correlation of 0.58 for all significant eQTL SNP-gene pairs and their corresponding pQTLs and a correlation of 0.75 for the effect sizes of all significant pQTL SNP-gene pairs when compared to the matching eQTLs. Similarly, for a  $P$  value cutoff  $P < 1 \times 10^{-5}$ , replication rates of 20%/32% for the top QTL per gene and effect size correlations of 0.61 and 0.79 for all SNP-gene pairs were determined.

Previous studies reported an overlap of 40% of plasma pQTLs[3] with a corresponding eQTL from the GTEx study[1]. However, these eQTLs were not specific for plasma but arose from all available GTEx tissues. Restricting to eQTLs found in whole blood, 19% of plasma pQTLs had a corresponding eQTL. Based on supplemental information given by the authors, the fraction of eQTLs in heart tissues (atrial appendage and left ventricle) that overlapped with plasma pQTLs was much smaller (<7.5%). The other way around, depending on the tissue-specific eQTLs, 12% to 21% of eQTLs also had a plasma pQTL which is well within the range of 17% we observed in our dataset. That implies a qualitatively comparable and reliable overlap between pQTLs and eQTLs which probably is even underestimated. For instance, when using a less stringent significance cutoff of FDR<0.1, a much higher coverage of measured proteins (4,381) and restricting the multiple testing burden by

using less SNP-gene pairs in the discovery dataset, Battle and colleagues achieved a much higher replication rate[2]. For matched transcriptomics and proteomics measurements in lymphoblastoid cell lines (LCL), they replicated 35% of eQTL SNP-gene pairs on proteomics level, compared to 14% in our study and 67% of pQTL SNP-gene pairs showed an eQTL, which was significantly more than 16% in our study.

It has to be mentioned, that the way of comparing QTLs differed vastly across studies. Battle and colleagues used overlapping SNP-gene pairs, without taking linkage information into account[2]. Sun and colleagues first defined lead SNPs in high LD regions ( $r^2 \geq 0.8$ ) for the same gene[3]. *Cis*-pQTLs in LCLs were also evaluated by Hause and colleagues[4] who found no overlapping *cis*-pQTLs and *cis*-eQTLs at their original significance threshold of  $FDR < 0.05$ .

### Enrichment of functional elements

To further elucidate regulatory mechanisms for the identified QTL associations, we annotated each variant-gene pair with publicly available functional genomics annotations, such as position in the exon, 5' UTR, 3' UTR or splice sites, microRNA binding sites (miRNA BS), transcription factor binding sites (TF BS), RNA-binding protein binding sites (RBP BS), chromatin states, possible missense mutations or nonsense mediated decay (NMD) (Supplementary Fig. 7).

Amongst others, there was a significant enrichment ( $P < 0.05$ , two-sided Fisher's exact test) of active transcription start sites (TssA), enhancer, exon, splice, 5' UTR and 3' UTR regions in eQTLs. Similar results have been reported by Lappalainen and colleagues[21].

Furthermore, independent pQTLs were enriched in exons, which was previously reported by Battle and colleagues for the comparable group of protein specific QTLs[2].

### GWAS catalog overlaps

Due to the strong signal of AF in our QTL results, we further investigated specific hits. We replicated the strong associations at the SYNPO2L locus, where genetic variation strongly influences MYOZ1 but not SYNPO2L. Only 2 (MYOZ1, PCCB) out of the 7 genes with eQTLs that overlapped with AF GWAS hits were measured on proteomics level. The MYOZ1 locus showed a strong eQTL and pQTL, where the QTL and GWAS  $P$  values[22] were highly correlated.

### Supplementary References

1. Gamazon, E. R. *et al.* Using an Atlas of Gene Regulation across 44 Human Tissues to Inform Complex Disease- and Trait-Associated Variation. *Nature Genetics* **50**, 956–967 (2018).
2. Battle, A. *et al.* Impact of Regulatory Variation from RNA to Protein. *Science* **347**, 664–667 (2015).
3. Sun, B. B. *et al.* Genomic Atlas of the Human Plasma Proteome. *Nature* **558**, 73–79 (2018).
4. Hause, R. J. *et al.* Identification and Validation of Genetic Variants That Influence Transcription Factor and Cell Signaling Protein Levels. *Am. J. Hum. Genet.* **95**, 194–208 (2014).
5. Wang, B. *et al.* Integrative Omics Approach to Identifying Genes Associated With Atrial Fibrillation. *Circ. Res.* **126**, 350–360 (2020).
6. Amberger, J. S., Bocchini, C. A., Schiettecatte, F., Scott, A. F. & Hamosh, A. OMIM.Org: Online Mendelian Inheritance in Man (OMIM®), an Online Catalog of Human Genes and Genetic Disorders. *Nucleic Acids Res.* **43**, D789–D798 (2015).
7. Hershberger, R. E. *et al.* Clinical and Functional Characterization of TNNT2 Mutations Identified in Patients with Dilated Cardiomyopathy. *Circ. Cardiovasc. Genet.* **2**, 306–313 (2009).

8. Doll, S. *et al.* Region and Cell-Type Resolved Quantitative Proteomic Map of the Human Heart. *Nat. Commun.* **8**, 1469 (2017).
9. Jhaveri, S., Aziz, P. F. & Saarel, E. Expanding the Electrical Phenotype of NKX2-5 Mutations: Ventricular Tachycardia, Atrial Fibrillation, and Complete Heart Block within One Family. *Hear. Case Rep.* **4**, 530–533 (2018).
10. Huang, R. T., Xue, S., Xu, Y. J., Zhou, M. & Yang, Y. Q. A Novel NKX2.5 Loss-of-Function Mutation Responsible for Familial Atrial Fibrillation. *Int. J. Mol. Med.* **31**, 1119–1126 (2013).
11. Kanaan, G. N., Patten, D. A., Redpath, C. J. & Harper, M. E. Atrial Fibrillation Is Associated With Impaired Atrial Mitochondrial Energetics and Supercomplex Formation in Adults With Type 2 Diabetes. *Can. J. Diabetes* **43**, 67–75 (2019).
12. El-Hattab, A. W. & Scaglia, F. Mitochondrial Cardiomyopathies. *Front. Cardiovasc. Med.* **3**, 25 (2016).
13. Orr, N. *et al.* A Mutation in the Atrial-Specific Myosin Light Chain Gene (MYL4) Causes Familial Atrial Fibrillation. *Nat. Commun.* **7**, 11303 (2016).
14. Tu, T., Zhou, S., Liu, Z., Li, X. & Liu, Q. Quantitative Proteomics of Changes in Energy Metabolism-Related Proteins in Atrial Tissue from Valvular Disease Patients with Permanent Atrial Fibrillation. *Circ. J.* **78**, 993–1001 (2014).
15. Coats, C. J. *et al.* Proteomic Analysis of the Myocardium in Hypertrophic Obstructive Cardiomyopathy. *Circ. Genomic Precis. Med.* **11**, e001974 (2018).
16. Parvatiyar, M. S. *et al.* A Mutation in TNNC1-Encoded Cardiac Troponin C, TNNC1-A31S, Predisposes to Hypertrophic Cardiomyopathy and Ventricular Fibrillation. *J. Biol. Chem.* **287**, 31845–31855 (2012).
17. Florian, A. R. & Yilmaz, A. in *Diagnosis and Management of Mitochondrial Disorders* (Springer, Basel, 2019).
18. Hayashi, T. *et al.* Tcap Gene Mutations in Hypertrophic Cardiomyopathy and Dilated Cardiomyopathy. *J. Am. Coll. Cardiol.* **44**, 2192–2201 (2004).
19. Dalal, R. S., Sabe, A. A., Elmadhun, N. Y., Ramlawi, B. & Sellke, F. W. Atrial Fibrillation, Neurocognitive Decline and Gene Expression after Cardiopulmonary Bypass. *Rev. Bras. Cir. Cardiovasc.* **30**, 520–532 (2015).
20. Storey, J. D. & Tibshirani, R. Statistical Significance for Genomewide Studies. *Proc. Natl. Acad. Sci.* **100**, 9440–9445 (2003).
21. Lappalainen, T. *et al.* Transcriptome and Genome Sequencing Uncovers Functional Variation in Humans. *Nature* **501**, 506–511 (2013).
22. Roselli, C. *et al.* Multi-Ethnic Genome-Wide Association Study for Atrial Fibrillation. *Nat. Genet.* **50**, 1225–1233 (2018).
